1 **Short title:** Permeability profiles of all 13 Arabidopsis PIPs

2

3 **Author for contact:** [Michael.Groszmann@anu.edu.au](mailto:Michael.Groszmann@anu.edu.au)

4

## 5 **Permeability profiling of all 13 Arabidopsis PIP aquaporins using a high** 6 **throughput yeast approach**

7

8 Michael Groszmann<sup>1\*</sup>, Annamaria De Rosa<sup>1</sup>, Weihua Chen<sup>1</sup>, Jiaen Qiu<sup>2</sup>, Samantha A McGaughey<sup>1</sup>,  
9 Caitlin S. Byrt<sup>1</sup> and John R Evans<sup>1</sup>

10

11 <sup>1</sup> ARC Centre of Excellence for Translational Photosynthesis, Research School of Biology, Australian  
12 National University, Canberra, ACT 2601, Australia

13 <sup>2</sup> ARC Centre of Excellence in Plant Energy Biology, School of Agriculture, Food and Wine, University  
14 of Adelaide, Glen Osmond, SA 5064, Australia

15

16 \* For correspondence [Michael.groszmann@anu.edu.au](mailto:Michael.groszmann@anu.edu.au) or Michael.groszmann@gmail.com

17

18 **One sentence summary:** Yeast based high throughput assays were developed to assess the  
19 permeability of each Arabidopsis PIP aquaporin isoform to water, H<sub>2</sub>O<sub>2</sub>, boric acid, urea and sodium.

20

### 21 **List of author contributions:**

22 MG conceived the original screening, framework, and research plans and made the yeast expressing  
23 the AtPIP constructs; MG and ADR developed the micro-cultivation methodology and established  
24 optimal treatment concentrations; MG developed data processing methodology, MG performed the  
25 AtPIP yeast screening experiments and analysis; MG and WC performed AtPIP interaction and yeast  
26 spheroplast analysis; JQ and SAM developed and performed the sodium uptake assay with supervision  
27 by CSB; MG, JRE, CSB and ADR analyzed the data and wrote the article. All authors critically reviewed  
28 the manuscript. MG agrees to serve as the author responsible for contact and ensures  
29 communication.

30

### 31 **Funding:**

32 MG, ADR and JRE were funded by the Australian Government through the Australian Research  
33 Council Centre of Excellence for Translational Photosynthesis (CE140100015). JQ was funded by ARC  
34 DP190102725. CSB was funded by ARC FT180100476. WC was funded by ANU. SAM was funded by  
35 Grains Research and Development Corporation (GRDC) through project 9174824 and ARC Centre of  
36 Excellence in Plant Energy Biology (CE140100008).

37

38

### 39 **Abstract**

40

41 Plant aquaporins have many more functions than just transporting water. Within the diversity of plant  
42 aquaporins are isoforms capable of transporting signaling molecules, nutrients, metalloids and gases.  
43 It is established that aquaporin substrate discrimination depends on combinations of factors such as  
44 solute size, pore size and polarity, and post-translational protein modifications. But our understanding  
45 of the relationships between variation in aquaporin structures and the implications for permeability  
46 is limited. High-throughput yeast-based assays were developed to assess diverse substrate  
47 permeabilities to water, H<sub>2</sub>O<sub>2</sub>, boric acid, urea and Na<sup>+</sup>. All 13 plasma membrane intrinsic proteins  
48 (PIPs) from Arabidopsis (AtPIPs) were permeable to both water and H<sub>2</sub>O<sub>2</sub>, although their effectiveness  
49 varied, and none were permeable to urea. AtPIP2 isoforms were more permeable to water than  
50 AtPIP1s, while AtPIP1s were more efficient at transporting H<sub>2</sub>O<sub>2</sub> with AtPIP1;3 and AtPIP1;4 being the  
51 most permeable. Among the AtPIP2s, AtPIP2;2 and AtPIP2;7 were also permeable to boric acid and

52 Na<sup>+</sup>. Linking AtPIP substrate profiles with phylogenetics and gene expression data enabled us to align  
53 substrate preferences with known biological roles of AtPIPs and importantly guide towards  
54 unidentified roles hidden by functional redundancy at key developmental stages and within tissue  
55 types. This analysis positions us to more strategically test *in planta* physiological roles of AtPIPs in  
56 order to unravel their complex contributions to the transport of important substrates, and secondly,  
57 to resolve links between aquaporin protein structure, substrate discrimination, and transport  
58 efficiency.

59  
60

## 61 Introduction

62

63 Aquaporins (AQPs) are membrane intrinsic proteins (MIPs) and constitute a major family of channel  
64 proteins found across all phylogenetic kingdoms (Chaumont and Tyerman, 2017). AQP monomers  
65 form a characteristic hour-glass membrane-spanning pore that differ in aperture and residue  
66 composition which determines their particular substrate selectivity and permeabilities. Four AQP  
67 monomers assemble to form tetrameric complexes which create a fifth central pore that has been  
68 implicated for the movement of CO<sub>2</sub> (Kaldenhoff *et al.*, 2014) and ions (Yu *et al.*, 2006) across  
69 membranes.

70

71 The AQP gene family has diversified to the greatest extent in plants. This may reflect greater  
72 duplication rates of plant genomes and the adaptation potential AQPs provide for a sessile lifestyle.  
73 Genomes of Angiosperm species commonly harbour between 30-50 isoforms, with extremes of 84  
74 and 121 in tobacco and canola, respectively (Groszmann *et al.*, 2017, Sonah *et al.*, 2017, De Rosa *et al.*,  
75 2020, Groszmann *et al.*, 2021). Of the 13 AQP subfamilies recognised in the plant kingdom, five  
76 subfamilies predominate in the angiosperms (PIPs, TIPs, NIPs, SIPs, and XIPs)(Laloux *et al.*, 2018). Each  
77 subfamily is generally characterised by sequence composition, a tendency to localise to different  
78 subcellular membranes, and transport different sets of substrates. Key pore features such as the dual  
79 Asn-Pro-Ala (NPA) motifs, the aromatic/Arginine (ar/R) filter and Froger's position have been  
80 associated with broader substrate selectivity (e.g. water vs. urea). However, gaining a more nuanced  
81 understanding of signatures related to substrate selectivity, transport efficiency and substrate  
82 exclusivity between isoforms requires more detailed characterisation. While a single AQP isoform can  
83 permeate a variety of substrates, surprisingly few have been surveyed for multiple substrates in  
84 parallel under similar conditions to establish comparative transport profiles.

85

86 Plant AQPs are implicated in numerous physiological processes including: water relations, organ  
87 growth, fertilisation, seed development and germination, abiotic stress responses, defence signalling,  
88 nutrient uptake and tolerance, and photosynthesis (Chaumont and Tyerman, 2017). Plant AQPs are  
89 permeable to many substrates indispensable for plant growth such as, water, CO<sub>2</sub> and nitrogen  
90 (NH<sub>3</sub>/NH<sub>4</sub><sup>+</sup>, urea and nitrate); micronutrients (boric acid and silicic acid) and other metalloids; signalling  
91 molecules hydrogen peroxide (H<sub>2</sub>O<sub>2</sub>) and nitric oxide (NO); O<sub>2</sub> and lactic acid to cope with anoxic stress;  
92 and key nutrients such as potassium (Chaumont and Tyerman, 2017, Qiu *et al.*, 2020, Singh *et al.*,  
93 2020). The diverse substrate specificities and involvement in key plant processes make AQPs  
94 interesting targets for engineering more resilient and productive crops (Afzal *et al.*, 2016, Singh *et al.*,  
95 2020), and for use in industrial filtration applications (Tang *et al.*, 2015, Hélix-Nielsen, 2018,  
96 Jafarinejad, 2020).

97

98 The increasing number of curated AQP gene families offers a rich source of isoform variation  
99 information. Having a high-throughput permeability assessment system for testing different isoforms  
100 would enable the building of a catalogue of information about their substrate profiles. The substrate  
101 selectivity and functional capacity of AQPs are routinely assessed in heterologous systems such as  
102 oocytes, liposomes, artificial membranes, and yeast (Madeira *et al.*, 2016). Most of these systems and

103 assays require specialized equipment (e.g. stopped-flow spectrophotometer), or complicated setups  
104 (e.g. artificial polymer membranes), or are labor intensive (e.g. *Xenopus laevis* oocytes), which  
105 preclude their use for high-throughput applications. By contrast, yeast offer a simple and versatile  
106 host for the heterologous production of aquaporins (Öberg *et al.*, 2009, Bill, 2014), with which to test  
107 different substrates.

108  
109 The diversity of well characterized mutant strains of *S. cerevisiae* enables bespoke optimization for  
110 screening specific substrate permeabilities of heterologously expressed AQPs. Mutant strains are  
111 available that are sensitive to a given cytotoxic agent, or where native transporters for compounds  
112 essential for growth that are not functional have been replaced by alternative uptake routes  
113 associated with the heterologously expressed AQP.

114  
115 Altered sensitivity of AQP-expressing yeast can be detected through cell dilution spot tests for colony  
116 formation on solid medium containing the test substrate. While this traditional method is more  
117 accessible, it has several drawbacks including being poorly quantitative (Hung *et al.*, 2018). Real-time  
118 optical density (OD) monitoring of yeast micro-volume cultures (< 300µl) can overcome the limitations  
119 of agar-based spot assays. They are particularly suitable for detecting small phenotypic changes in  
120 yeast population growth and are a well-established method for monitoring responses to chemical  
121 treatments (Warringer and Blomberg, 2003, Toussaint *et al.*, 2006, Marešová and Sychrová, 2007).

122  
123 Here, we establish a qualitative and quantitative methodological framework, involving a high-  
124 throughput micro-cultivation-based yeast system, to functionally characterize AQP transport  
125 selectivity and capacity. We applied these methods to all 13 members of the Arabidopsis PIP  
126 aquaporin family (AtPIPs), determining their permeabilities to water, hydrogen peroxide, boric acid,  
127 urea and sodium. This type of approach could be used to efficiently catalogue the transport capacity  
128 of a large number of AQPs to clarify their biological roles in plants. It also has the potential to help  
129 decipher the nuanced characteristics of transport selectivity and efficiency necessary for future  
130 engineering of AQPs for specific biotechnological applications.

131

132

## 133 **Results**

134

### 135 **Developing high-throughput micro-volume yeast culturing assays to assess aquaporin function**

136

#### 137 ***Optimizing conditions for reproducible growth curves***

138 We established a high-throughput *Saccharomyces cerevisiae* (yeast) micro-cultivation (200 µl) method  
139 using 96-well plates. The micro-cultures were incubated in a plate reader with versatile control over  
140 temperature, shaking, and OD reading modes. We optimized these parameters to find conditions that  
141 generated repeatable growth curves (Fig. 1A; see Supplemental Materials and Methods for details).  
142 We observed that micro-volume cultures tended to aggregate and sediment in wells regardless of the  
143 shaking intensity. Sedimentation was managed using a double orbital shaking mode which dispersed  
144 yeast evenly across the bottom of the well and recording OD as an average of multiple measurements  
145 at distinct points around each well using the well scanning mode on the plate reader.

146

#### 147 ***Adjusting for non-linearity of OD measurements at high cell density***

148 Growing yeast cultures quickly achieve densities that far exceed saturation limits of optical detection  
149 in spectrophotometers (Fig. 1A) (Stevenson *et al.*, 2016). This severely underestimates 'true' ODs at  
150 higher cell densities, resulting in compressed growth curves and systematic distortion of extracted  
151 fitness components required to evaluate culture health and growth (Warringer and Blomberg, 2003,  
152 Fernandez-Ricaud *et al.*, 2016).

153

154 We compared ‘recorded’ ODs against ‘true’ ODs calculated from dilution factors. A single polynomial  
155 function described the relationship between ‘recorded’ and ‘true’ OD datasets that was valid for all of  
156 the strains of *S. cerevisiae* used in this study ( $R^2 > 0.99$ ; Supplemental Fig. S1). Applying this calibration  
157 function to calculate corrected OD values ( $^{Corr.}OD$ ), improved the resolution of key derived growth  
158 characteristics: initial lag phase ( $\lambda$ ), maximum growth rate ( $\mu$ ), and final carrying capacity or biomass  
159 yield ( $\kappa$ ) (Fig. 1B).

160

### 161 **Establishing the Phi ( $\phi$ ) measuring point and AUC value**

162 To simplify the phenotyping, we calculated Area Under the Curve (AUC) as a single all-encompassing  
163 parameter that captured  $\lambda$ ,  $\mu$  and  $\kappa$  (Fig. 1C). We observed that heterologous expression of AtPIPs can  
164 differentially alter yeast growth traits independent of chemical treatment (Supplemental Table S1).  
165 This may occur to an even greater extent when assessing more diverse AQP isoforms. Altered inherent  
166 growth would mean yeast cultures mature at different rates, thereby complicating the evaluation of  
167 growth differences, especially when measuring all cultures at a single time point. Measuring a given  
168 culture sub-set too soon potentially misses growth phenotypes arising from subtle responses to  
169 treatments. Measuring too late, and the rapidly growing control cultures have plateaued, allowing  
170 the slower growing treated cultures time to catch up and reduce the difference. To account for  
171 variation in culture maturity times, we implemented a dynamic standardizing measuring point termed  
172 Phi ( $\phi$ ), defined just prior to the stationary phase of log transformed growth curves, at the point the  
173 population growth rate drops below 5% of maximum (Fig. 1B).  $\phi$  is established on the best growing  
174 culture for a given AQP set (Fig. 1C), i.e. the untreated control when evaluating cytotoxic compounds  
175 (e.g.  $H_2O_2$ ), or the culture with the highest supplementation of essential nutrient when examining  
176 growth requiring agents (e.g. urea). AUCs for all cultures were calculated from the start of cultivation  
177 until  $\phi$  (Fig. 1C), with  $AUC_{treated}/AUC_{control}$  providing relative differences in growth ( $\Delta AUC$ ). In our  
178 routine conditions, all control cultures reached and remained in stationary phase for an extended  
179 period of time. As such,  $\phi$  can be shifted ( $\phi_{+t}$ ) in order to capture additional data from treated cultures  
180 that grow very slowly; with an understanding that  $\Delta AUC$  will be underestimated because the control  
181 culture plateaued earlier (Fig. 1C). Once  $\Delta AUC$  values are established for each AQP, they are compared  
182 between AQPs to rank transport efficiencies.

183

### 184 **Heterologous AtPIP production in yeast**

185 Having an abundance of AQP protein is the first essential requirement for robust functional  
186 evaluations and improves the detection limit in response to treatments. For example, the water  
187 permeability for AtPIP2;3 was assessed using two promoters, with greater freeze-thaw tolerance (a  
188 proxy for water permeability) achieved using the strong GPD promoter relative to the less active TPI1  
189 promoter (Supplemental Fig. S2). To maximize the likelihood of high AtPIP production we (i) used high  
190 copy number plasmids with minimal load burdens on yeast growth, (ii) used a strong constitutive GPD  
191 promoter with complementing terminator, (iii) ensured codon usage compatibility between AtPIPs  
192 and yeast, and (iv) modified the Kozak sequence to enhance translational initiation (see Supplemental  
193 Materials and Methods). A parallel collection of *AtPIP-GFP* transgenes that differed only in the C-  
194 terminal GFP fusion compared to the expression vectors used in the functional assays, were used for  
195 evaluating heterologous AtPIP production *in vivo* and subcellular localization. All 13 AtPIP-GFP yeast  
196 lines repeatedly emitted strong GFP signal, indicating high AtPIP protein production (Supplemental  
197 Fig. S3), except for AtPIP1;4 which had 27% of the average fluorescence intensity. However, as  
198 described below, substrate transport associated with AtPIP1;4 was comparable with other AtPIP1  
199 isoforms.

200

### 201 **Subcellular localization of AtPIPs in yeast**

202 In addition to ample heterologous protein production, sufficient AtPIP needs to localize to the yeast  
203 plasma membrane (PM) in order to evaluate AQP-driven changes in substrate permeation into the  
204 cell. Sub-cellular localization of the AtPIPs was evaluated using confocal microscopy of AtPIP-GFP lines

205 and compared against cytosolic (GFP only) and endoplasmic reticulum (ER; SEC63-RFP) markers (Fig.  
206 2). Free GFP is cytosolically localized (Fig. 2A). The SEC63-RFP marker reveals the web-like ER network,  
207 with the prominent nuclear envelope ER domain (nER) and peripheral or cortical ER domain (cER) (Fig.  
208 2B). The cER lies immediately adjacent to the plasma membrane but is discontinuous around the  
209 perimeter with discernible gaps distinguishing it from PM localisation (Fig. 2B). A sharp ring around  
210 the cell perimeter was seen for all 8 AtPIP2-GFP proteins, consistent with strong PM integration (Fig.  
211 2, E, F, I, J, M, N, Q and R). By contrast, when expressed alone, the five AtPIP1-GFP proteins show dual  
212 localization consisting of a patchy peripheral ring and internal webs like the SEC63-RFP ER marker (Fig.  
213 2, C, G, K, O and S), along with a distinct continuous ring around the periphery indicating PM  
214 localization, but less efficient than AtPIP2s.

215

### 216 **Co-expression with AtPIP2;5 enables AtPIP1s to more efficiently localize to the yeast PM**

217 PIP2 proteins can interact and guide PIP1 proteins more efficiently to the PM (Jozefkiewicz *et al.*, 2017).  
218 The Yeast-two-Hybrid mating-based Split-Ubiquitin System (Y2H mbSUS; Fig. 3A) was used to screen  
219 an AtPIP interactome library. Yeast co-expressing the bait AtPIP2;5-CubPLV and any of the AtPIP1;1-  
220 Nub to AtPIP1;5-Nub prey proteins, activated the *lacZ* reporter  $\geq 4$ -fold above background levels (Fig.  
221 3B), demonstrating that AtPIP2;5 strongly interacted with each AtPIP1. Co-expression of *AtPIP2;5* with  
222 *GFP* tagged versions of *AtPIP1;1* to *1;5*, resulted in most of the fluorescence signal now being  
223 associated with the PM (Fig. 2, D, H, L, P and T). *AtPIP2;5* was chosen because, among the *AtPIP2*s, it  
224 showed moderate levels of apparent permeability to the tested substrates, enabling further  
225 improvements in permeability due to the co-expressed AtPIP1 isoforms to be observed.

226

227

### 228 **Characterizing AtPIP water permeability**

229 The permeability of AtPIPs to water was tested using a rapid freeze-thaw assay adapted to our micro-  
230 cultivation setup. For wild type yeast carrying an empty vector, successive freeze-thaw treatments  
231 incrementally decreased  $\Delta$ AUC (Supplemental Fig. S4, A and B). Freeze-thawing prolonged the lag  
232 phase (Supplemental Fig. S4C), consistent with a reduction in the viable cell count of the starting  
233 population, which delayed the detection of population growth. The sensitivity of the freeze-thaw  
234 assay was improved by using the *aquaporin* null mutant background (*aqy1 aqy2*), which is  
235 compromised in tolerance to rapid freeze-thaw events (Tanghe *et al.*, 2002, Tanghe *et al.*, 2004). Two  
236 freeze-thaw cycles were sufficient to essentially render the entire *aqy1 aqy2* starting population  
237 unviable (Supplemental Fig. S4, A-C). Heterologous expression of a water permeable AQP (*AtPIP2;1*)  
238 (Verdoucq *et al.*, 2008), dramatically improved the tolerance of the *aqy1 aqy2* mutant to repeated  
239 freeze-thaw treatments (Supplemental Fig. S4, A-C).

240

241 Application of two freeze-thaw treatments to *aqy1 aqy2* yeast carrying one of the 13 AtPIP genes or  
242 an empty vector differentially affected the growth curves (Fig. 4A). All of the AtPIP2 proteins had  
243 sufficient capacity to transport water across the PM to confer freeze-thaw tolerance, but their  
244 effectiveness varied with AtPIP2;7 the most effective and AtPIP2;2 the least effective (Fig. 4B). At  $\phi$ ,  
245 growth was not detected for any *AtPIP1* expressing lines. Freeze-thaw tolerance associated with  
246 AtPIP1s was revealed by calculating AUC at  $\phi + 1000$  mins, but resolution between AtPIP2 isoforms  
247 was lost (Fig. 4C). The implied water transport capacity of AtPIP1s were substantially lower than the  
248 AtPIP2s.

249

250 Water permeability of AtPIP1s was further assessed by increasing their abundance in the PM through  
251 co-expression with *AtPIP2;5*. Yeast co-transformed with *AtPIP2;5* + *Empty* vector served as a base-  
252 level control, with less freeze-thaw tolerance than yeast carrying the *AtPIP2;5* vector alone or co-  
253 expressing two copies of *AtPIP2;5* (Figure 4D). This is consistent with *AtPIP2;5* + *Empty* vector yeast  
254 having reduced expression of *AtPIP2;5* as only half the plasmid load carries *AtPIP2;5*. Co-expression of  
255 *AtPIP1;1*, *1;2*, *1;3*, *1;4* or *1;5* with *AtPIP2;5* substantially improved freeze-thaw survivorship over the



256 *AtPIP2;5* + *Empty* vector control, being from ~40-75% as effective as *AtPIP2;5* (i.e. *AtPIP2;5* + *AtPIP2;5*;  
257 Fig. 4D). This revealed that *AtPIP1* isoforms have significant capacity to transport water, but are less  
258 efficient than *AtPIP2*s.

259  
260 Water permeability was also assessed using the traditional, but more laborious, yeast spheroplast  
261 bursting method (Fig. 4E). Water transport efficiencies were ranked *AtPIP2;7* > *AtPIP2;1* > *AtPIP1;5* >  
262 empty, matching the order and approximate magnitude of differences obtained from the freeze-thaw  
263 assay. The consistency in results from the two methods validated assessment of water permeability  
264 across the *AtPIP* family using the freeze-thaw assay which provided a qualitative and quantitative  
265 platform to rapidly evaluate water transport capacity of AQPs.

### 266 267 **Characterization of *AtPIP* H<sub>2</sub>O<sub>2</sub> permeability**

268 Hydrogen peroxide (H<sub>2</sub>O<sub>2</sub>) treatments impaired growth of the empty vector *aqy1 aqy2* yeast (Fig. 5A),  
269 impacting all three growth traits ( $\lambda$ ,  $\mu$ , and  $\kappa$ ; Supplemental Fig. S5). The effects were more prominent  
270 when using the *skn7* yeast which is compromised in its antioxidant buffering capacity (Fig. 5A;  
271 Supplemental Fig. S5). 0.5mM and 1mM H<sub>2</sub>O<sub>2</sub> were chosen as treatment concentrations as they occur  
272 at the commencement of pronounced growth inhibition on the dose response curves (Figure 5B).

273  
274 Growth relative to the empty vector control was inhibited by 0.5mM H<sub>2</sub>O<sub>2</sub> for all *AtPIP2* expressing  
275 *aqy1 aqy2* yeast lines except *AtPIP2;6* (Supplemental Fig. S6A). All *AtPIP2* yeast lines grew worse than  
276 empty vector control at 1mM H<sub>2</sub>O<sub>2</sub> (Fig. 5C), indicating that all *AtPIP2* proteins can facilitate enhanced  
277 diffusion of H<sub>2</sub>O<sub>2</sub> across the PM to some extent. *AtPIP2;6* had the least and minimal implied capacity,  
278 while all other *AtPIP2*s were assessed as efficient H<sub>2</sub>O<sub>2</sub> transporters, with *AtPIP2;7* seemingly the most  
279 effective (Fig. 5C). The *AtPIP1*s showed no indication of enhancing H<sub>2</sub>O<sub>2</sub> diffusion across the PM  
280 beyond the passive background diffusion rate represented by the empty vector *aqy1 aqy2* control,  
281 with the exception of a small effect for *AtPIP1;1* at 1mM H<sub>2</sub>O<sub>2</sub> (Fig. 5C).

282  
283 When expressed in *skn7*, *AtPIP1;3*, *1;4*, and *1;5* conferred greater sensitivity to H<sub>2</sub>O<sub>2</sub> (at 1mM) than  
284 empty vector control, indicating that these isoforms also facilitate H<sub>2</sub>O<sub>2</sub> transport across the PM (Fig.  
285 5D). The growth reduction sat between the efficient *AtPIP2;2* and inefficient *AtPIP2;6* H<sub>2</sub>O<sub>2</sub>  
286 transporters originally assessed in the *aqy1 aqy2* background (Fig. 5C). Intriguingly, *skn7 AtPIP1;2*  
287 yeast grew consistently better than empty vector control (several independent transformation  
288 events), suggesting that expression of *AtPIP1;2* somehow protects *skn7* against H<sub>2</sub>O<sub>2</sub> treatment (Fig.  
289 5D).

290  
291 Co-expression of *AtPIP2;5* with any of the *AtPIP1*s dramatically increased the sensitivity of *skn7* yeast  
292 to H<sub>2</sub>O<sub>2</sub> over the *AtPIP2;5* + *Empty* vector control. The effect was clearly evident at 0.5mM (Fig. 5E)  
293 and even as low as 0.25mM H<sub>2</sub>O<sub>2</sub> (Supplemental Fig. S6C), whereas 1mM H<sub>2</sub>O<sub>2</sub> was required to observe  
294 a significant increase in *skn7* sensitivity beyond the empty vector control when the *AtPIP1*s were  
295 expressed alone (Fig. 5D; Supplemental Fig. S6B). *AtPIP2;5* + *AtPIP1;3* and *AtPIP2;5* + *AtPIP1;4* *skn7*  
296 lines were the most sensitive, with  $\Delta$ AUC below 15% of the *AtPIP2;5* + *Empty* vector control (Fig. 5E).  
297 To test whether the observed co-expressed effects related to *AtPIP1* H<sub>2</sub>O<sub>2</sub> transport or some form of  
298 hyperactivation of *AtPIP2;5* H<sub>2</sub>O<sub>2</sub> transport through hetero-oligomerization, we generated a mutant  
299 version of *AtPIP1;4* (*AtPIP1;4H207K*) with reduced channel activity (see Supplemental Materials and  
300 Methods). In an independent collection of H<sub>2</sub>O<sub>2</sub> assays, increasing PM abundance of *AtPIP1;4* through  
301 *AtPIP2;5* + *AtPIP1;4* co-expression, once again dramatically sensitized *skn7* yeast to H<sub>2</sub>O<sub>2</sub> (Fig. 5F).  
302 However, when *AtPIP2;5* was co-expressed with the *AtPIP1;4H207K* closed gated mutant, the  $\Delta$ AUC  
303 values resembled growth levels more similar to *AtPIP2;5* + *Empty* control (Fig. 5F). This supports the  
304 interpretation that *AtPIP1;4* was responsible for the enhanced H<sub>2</sub>O<sub>2</sub> sensitivity of the *AtPIP2;5* +  
305 *AtPIP1;4* yeast. Overall, the co-expression results suggest that *AtPIP1* proteins transport H<sub>2</sub>O<sub>2</sub> more  
306 efficiently than *AtPIP2* isoforms.

307

### 308 **Characterization of AtPIPs boric acid permeability**

309 A range of boric acid (BA; H<sub>3</sub>BO<sub>3</sub>) concentrations were tested on *aqy1 aqy2* empty vector yeast to  
310 determine treatment doses. BA treatments mainly reduced the rate of growth ( $\mu$ ) (Fig. 6A;  
311 Supplemental Fig. S7).  $\Delta$ AUC at  $\phi$  relative to untreated cultures followed a single dose response curve  
312 and 20mM and 30mM BA were selected as optimal treatment concentrations (Figure 6B).

313

314 Five of the 13 AtPIP yeast lines were more sensitive to BA than the empty vector control (Fig. 6C, D).  
315 *AtPIP1;1* expressing yeast were by far the most sensitized to BA, with dramatic growth reductions  
316 even at 20mM BA. Yeast expressing *AtPIP2;2*, *2;7* and *2;8* had sensitivities similar to the *HvPIP1;4*  
317 positive control. *AtPIP1;5* yeast showed a small increase in BA sensitivity, which was significant in  
318 three of the four experiments (Fig. 6D; Supplemental Fig. S8A and B). Co-expression of AtPIP1s with  
319 *AtPIP2;5* did not alter BA sensitivity compared to the yeast expressing *AtPIP1s* alone (Fig. 6D;  
320 Supplemental Fig. S8B).

321

322 Truncation of the cytosolic N-terminal domain of some plant AQPs, including several PIP1 isoforms, is  
323 necessary to observe boron, or similar metalloids, uptake in yeast (Bienert *et al.*, 2008, Fitzpatrick and  
324 Reid, 2009, Kumar *et al.*, 2014, Mosa *et al.*, 2016). We generated and tested several PIP isoforms with  
325 truncations of the cytosolic N-terminal domain (*AtPIP1;2 $\Delta$ 2-47*, *AtPIP1;4 $\Delta$ 2-47* and *AtPIP1;5 $\Delta$ 2-48*). The  
326 truncated versions had similar sensitivity to BA as their full-length counterparts (data not shown).  
327 Overall, the results indicate that five members across both the *AtPIP1* and *AtPIP2* sub-families are  
328 capable of significant BA transport.

329

### 330 **Characterization of AtPIPs for urea permeability**

331 Growth of the empty vector *ynvw1 (dur3)* urea uptake deficient mutant was enhanced by increasing  
332 concentrations of urea; specifically through increased maximum growth rate and carrying capacity  
333 (Fig. 7A,B; Supplemental Fig. S9). None of the AtPIPs improved urea uptake, whereas the positive  
334 control *AtTIP2;3* (Dynowski *et al.*, 2008a) clearly complemented the *dur3* phenotype at 4mM urea (Fig.  
335 9C). With 12mM urea, all yeast lines grew similarly to the empty vector control (Fig. 9C). This indicates  
336 that firstly, all AtPIP yeast cultures were healthy and capable of growing better in response to  
337 increased urea diffusion. Secondly, the overall urea influx across the PM at 12mM exceeded the  
338 growth complementation provided by urea transport through *AtTIP2;3*. None of the AtPIPs were  
339 significantly permeable to urea.

340

### 341 **Characterization of AtPIPs for Na<sup>+</sup> ion permeability**

342 To assess AtPIP potential for Na<sup>+</sup> transport, we quantified Na<sup>+</sup> accumulation in AtPIP expressing yeast,  
343 following NaCl treatments (Qiu *et al.*, 2020). Exposing yeast to 70mM NaCl resulted in a ~40-fold  
344 increase in the Na<sup>+</sup> content of *aqy1 aqy2* yeast cells relative to yeast from media without additional  
345 NaCl (Fig. 8). The five AtPIP1 isoforms and *AtPIP2;5* accumulated Na<sup>+</sup> similar to the empty vector  
346 control. Yeast producing *AtPIP2;1*, *2;2*, *2;6* and *2;7* accumulated more Na<sup>+</sup>, while yeast producing  
347 *AtPIP2;3*, *2;4*, and *2;8* accumulated less Na<sup>+</sup> than empty vector control. *AtPIP2;1* served as a positive  
348 control (Byrt *et al.*, 2017).

349

### 350 **The evolutionary relationship, substrate profiles, and gene expression patterns of AtPIPs**

351 Protein sequence alignments reveal the high homology between AtPIPs (Supplemental Figure S10).  
352 Motifs associated with substrate selectivity (i.e. NPA, ar/R and Froger's positions) are essentially  
353 identical among the AtPIPs (Supplemental Table S2). Gross differences are seen in the longer N-  
354 terminal and shorter C-terminal domains of AtPIP1s compared to AtPIP2s, and variation in the length  
355 of loop A (Supplemental Table S2). Phylogenetic analysis shows that AtPIPs divide into discrete sub-  
356 clades that show distinct relationships with their substrate profiles and organ level gene expression  
357 (Fig. 9). For example, the *AtPIP1;1* and *1;2* paralogs appear to have undergone substantial functional

358 diversification based on their gene expression patterns. *AtPIP1;2* is the most abundantly and  
359 constitutively expressed of all *AtPIPs*, even detected at high levels in dry seed. *AtPIP1;1*, is mainly  
360 expressed in roots, being ~6-fold less prevalent in aerial tissues. This diversification in expression  
361 patterns could relate to boric acid transport being present in *AtPIP1;1*, but absent in *AtPIP1;2* (Fig. 9).  
362 The *AtPIP1;3* and *1;4* paralog pair, appear to have evolved as highly efficient transporters of H<sub>2</sub>O<sub>2</sub> while  
363 being the least efficient at water transport of the *AtPIPs*. Both genes are broadly expressed with  
364 largely overlapping expression domains, which together with their similar transport profiles points  
365 towards possible functional redundancy. *AtPIP1;3* differs from *AtPIP1;4* by being more highly  
366 expressed in general, especially in the root and stem. *AtPIP1;3* expression is also up-regulated during  
367 seed imbibition and seedling germination, whereas *AtPIP1;4* is only weakly expressed at this stage of  
368 development (Fig. 9). Intriguingly, *AtPIP1;5* sits as a phylogenetic outgroup within the *AtPIP1* clade,  
369 and transports all three substrates that *AtPIP1s* could transport (water, H<sub>2</sub>O<sub>2</sub> and boric acid). *AtPIP1;5*  
370 was ranked as the most efficient *AtPIP1* water transporter (Fig. 9) and *AtPIP1;5* transcripts are  
371 particularly abundant in elongating siliques and the developing seed within.

372  
373 Among the *AtPIP2* isoforms, *AtPIP2;7* has the most diverse substrate profile and expression patterns,  
374 being capable of transporting water, H<sub>2</sub>O<sub>2</sub>, boric acid, and Na<sup>+</sup> ions at comparatively high efficiency.  
375 *AtPIP2;7* is expressed at high levels in most tissues, with the exception of mature leaves and dry seed,  
376 but is upregulated during seed imbibition and germination (Fig. 9). Its closest relative, *AtPIP2;8*, is also  
377 capable of transporting water, H<sub>2</sub>O<sub>2</sub>, and boric acid, but *AtPIP2;8* has relatively low expression under  
378 non-stressed growth conditions (Fig. 9). This reveals that *AtPIP2;8* is either highly cell specific,  
379 conditionally expressed, or that *AtPIP2;7* is the dominant isoform of this closely related pair. The  
380 *AtPIP2;5* and *AtPIP2;6* phylogenetic pair are noteworthy as being the least efficient H<sub>2</sub>O<sub>2</sub> transporters  
381 of all *AtPIPs* and they are not expressed in roots (Fig. 5C and 9). *AtPIP2;5* is expressed in meristematic  
382 tissue and developing seed, and *AtPIP2;6* expression is localized to aerial vegetative and reproductive  
383 tissues (Fig. 9).

384

385

## 386 Discussion

387

### 388 High-throughput yeast micro-cultivation assays for testing AQP substrate permeability profiles

389

390 Yeast-based systems for the heterologous expression and functional assessment of aquaporins offer  
391 numerous advantages over other systems such as oocytes, liposomes, and artificial membranes. Key  
392 advantages include: a large range of well-characterized mutant *S. cerevisiae* strains which can be used  
393 for testing different compounds; monitoring growth is simple; scalable to high-throughput processing;  
394 the power of sampling a yeast population versus single cell/event sampling in other systems.

395

396 Many studies show that altered growth in response to various chemical treatments of AQP expressing  
397 yeast reflects an enhanced intracellular accumulation of the tested substrate (Bienert *et al.*, 2007,  
398 Bienert *et al.*, 2008, Dynowski *et al.*, 2008b, Fitzpatrick and Reid, 2009, Bienert *et al.*, 2011, Kumar *et al.*,  
399 *et al.*, 2014, Mao and Sun, 2015, To *et al.*, 2015, Mosa *et al.*, 2016, Rhee *et al.*, 2017, Wang *et al.*, 2019).  
400 We did not detect any indirect effects of AQP expression on yeast susceptibility to chemical  
401 treatments (Supplemental Note 1). Since liquid cultures provide superior substrate exposure and  
402 enable detection of smaller phenotypic changes relative to yeast grown on solid plates (Toussaint *et al.*,  
403 2006, Marešová and Sychrová, 2007, Hung *et al.*, 2018), we developed a liquid micro-cultivation  
404 system enabling high-throughput, quantitative real-time monitoring of yeast growth and changes  
405 induced by treatments. The 96-well plate format offers room for multiple samples in one experiment,  
406 simplifying statistical evaluation. Optical density measurement removed the element of human  
407 subjectivity used to assess yeast spots.

408



409 The implementation of a dynamic measuring point  $\phi$ , enabled standardized evaluation between  
410 different AQP expressing yeast lines. Differential growth responses due to increased substrate  
411 diffusion into the yeast were captured by the single parameter, AUC.

412  
413 High AQP contents in heterologous systems are critical for accurate assessment of functional capacity  
414 and to avoid false-negative permeabilities (Bienert *et al.*, 2014). We maximized the likelihood of high  
415 AtPIP production by careful design of our AtPIP yeast expression constructs. The AtPIPs must also  
416 integrate into the yeast plasma membrane in order to affect substrate transport into the yeast cell.  
417 We found that AtPIP2s localize efficiently to the PM, while AtPIP1s co-localize to the PM and ER. Poor  
418 PM localization of PIP1s expressed alone in heterologous systems is a common phenomenon (Yanef  
419 *et al.*, 2015), likely due to sequence differences in the diacidic, LxxxA and C-terminal phosphorylation  
420 protein motifs known to control PIP2 PM trafficking (Supplemental Table 2)(Chevalier and Chaumont,  
421 2015). The exact composition of diacidic and LxxxA motifs vary, particularly between the  
422 phylogenetically distinct [2;1, 2;2, 2;3, 2;4] and [2;5, 2;6, 2;7, 2;8] groups (Supplemental Table 2), yet  
423 all AtPIP2s localized efficiently to the yeast PM. In plants, the phylogenetically distinct AtPIP2;1 and  
424 AtPIP2;7 also localize efficiently to the PM (Sorieu *et al.*, 2011, Hachez *et al.*, 2014). This reveals  
425 flexibility in these motif sequences that must work together with other domains (e.g. TMH2; Wang *et*  
426 *al.*, 2019) to control ER to PM trafficking. PIP2 proteins can physically interact with PIP1s and facilitate  
427 PM integration in both host and heterologous systems (Jozefkowicz *et al.*, 2017). We enhanced AtPIP1  
428 PM localization by co-expression with AtPIP2;5, thereby enabling the comparison of transport  
429 efficiencies.

430

#### 431 **AtPIP water permeability**

432 Water permeability is the most extensively studied function of PIPs across species. Most AtPIPs have  
433 been confirmed to transport water (AtPIP1;1, 1;2, 1;3, 2;1, 2;2, 2;3, 2;4, 2;6, and 2;7) (Kammerloher  
434 *et al.*, 1994, Tournaire-Roux *et al.*, 2003, Heckwolf *et al.*, 2011, Byrt *et al.*, 2017, Kourghi *et al.*, 2017,  
435 Wang *et al.*, 2020a). These assessments are from different studies and systems making it difficult to  
436 directly compare transport efficiencies. Here, water permeability was assessed for the complete set  
437 of AtPIPs using a freeze-thaw assay that we established for rapidly evaluating water transport capacity  
438 of AQPs. We found that all AtPIP isoforms transport water, with AtPIP2s more efficient than AtPIP1s.  
439 Studies that concluded PIP1s have low/no permeability to water, may reflect the inefficient targeting  
440 of PIP1s to the PM in heterologous systems [reviewed in (Yanef *et al.*, 2015)].

441

442 PIPs provide a transcellular route for water flow in the plant, from water uptake by roots to  
443 transpiration loss from aerial tissues (Groszmann *et al.*, 2017). Both AtPIP1 and AtPIP2 isoforms play  
444 major roles in water flow in Arabidopsis (Javot *et al.*, 2003, Prado *et al.*, 2013, Sade *et al.*, 2014).  
445 Overlapping expression patterns suggest substantial functional redundancy, which limits the ability of  
446 reverse genetic studies to resolve the contribution of each AtPIP to water flow. For example, single  
447 loss-of-function mutants of high leaf-expressing isoforms *Atpip1;2*, *Atpip2;1* and *Atpip2;6* each show  
448 a ~20% reduction in rosette hydraulic conductivity, which worsens to ~39% in the triple mutant (Prado  
449 *et al.*, 2013). Our observations that *AtPIP2;7* is highly permeable to water and is abundantly expressed  
450 in developing leaves (Figure 9), suggests it may also contribute to rosette hydraulic conductivity.  
451 Similarly, redundancy for root hydraulic conductance is likely given that the 10-20% reductions seen  
452 in single *Atpip* mutants falls short of the ~64% decrease achieved using AQP chemical blockers (Maurel  
453 *et al.*, 2015). Four of the seven *AtPIPs* abundantly expressed in roots (Figure 9), are the more water  
454 permeable AtPIP2 isoforms (AtPIP2;1, 2;2, 2;4, 2;7) and thus strong candidates for multiple knock-out  
455 mutant studies.

456

457 More intricate developmental processes relying on cell-to-cell water movement through AtPIPs are  
458 emerging. For example, guard cell closure (Grondin *et al.*, 2015), lateral root emergence (Péret *et al.*,  
459 2012), and pollen germination on stigmatic papillae (Windari *et al.*, 2021). A number of AtPIPs are

460 expressed in the flower, developing silique and seeds. In these tissues, AtPIP water transport could  
461 have roles in petal expansion, anther/pollen development, and assist in the supply of nutrients to the  
462 developing seed as seen in other species (Hoai *et al.*, 2020, Wang *et al.*, 2020b).

#### 463 464 **AtPIP H<sub>2</sub>O<sub>2</sub> permeability**

465 All AtPIPs are capable of transporting H<sub>2</sub>O<sub>2</sub> when expressed in yeast (Figure 5), which is consistent with  
466 the similar physicochemical properties of H<sub>2</sub>O<sub>2</sub> and water (Almasalmeh *et al.*, 2014). Previous growth-  
467 based assessments with yeast did not assign H<sub>2</sub>O<sub>2</sub> permeability to AtPIP1 isoforms and showed mixed  
468 results for AtPIP2 isoforms (Hooijmaijers *et al.*, 2012, Wang *et al.*, 2019, Wang *et al.*, 2020a). This may  
469 have been due to inadequate protein production, insufficient PM targeting, choice of yeast strain, sub-  
470 optimal H<sub>2</sub>O<sub>2</sub> concentrations, or use of solid medium spot growth assays.

471  
472 The potential for H<sub>2</sub>O<sub>2</sub> transport through AtPIP1s was recently hinted at using AtPIP1/2 chimeric  
473 proteins that more effectively localize to the PM (Wang *et al.*, 2019). However, in addition to  
474 harboring PM targeting motifs, the substituted PIP2 domains also contribute to the pore lining, making  
475 it uncertain how representative these chimeric proteins are of native AtPIP1 function. In our system,  
476 we were able to show that native AtPIP1 proteins are indeed capable of transporting H<sub>2</sub>O<sub>2</sub>, and when  
477 efficiently targeted to the PM through co-expression, are potentially more effective transporters of  
478 H<sub>2</sub>O<sub>2</sub> than AtPIP2 isoforms.

479  
480 H<sub>2</sub>O<sub>2</sub> is an indispensable signaling molecule involved in many aspects of plant growth, biotic defense  
481 and abiotic stress responses, reliant on AQPs to facilitate its movement between sub-cellular  
482 compartments and cells (Černý *et al.*, 2018, Fichman *et al.*, 2021). The diversity of AtPIP expression  
483 patterns and H<sub>2</sub>O<sub>2</sub> transport efficiencies, enable fine tuning of H<sub>2</sub>O<sub>2</sub> signaling. Direct physiological  
484 evidence in Arabidopsis is emerging, with H<sub>2</sub>O<sub>2</sub> transport through AtPIP2;1 involved in triggering  
485 stomatal closure (Rodrigues *et al.*, 2017) and mediating systemic acquired acclimation to abiotic stress  
486 (Fichman *et al.*, 2021), and AtPIP1;4 mediating H<sub>2</sub>O<sub>2</sub> triggered immunity against pathogen attack (Tian  
487 *et al.*, 2016). Our results show that the *AtPIP1;3/1;4* paralogs have evolved into highly efficient H<sub>2</sub>O<sub>2</sub>  
488 transporters with largely overlapping tissue-specific expression patterns. This redundancy suggests  
489 that *AtPIP1;3* could also mediate H<sub>2</sub>O<sub>2</sub> signaling for plant immunity. Supporting this idea, H<sub>2</sub>O<sub>2</sub>  
490 translocation into the cell is decreased but not eliminated in the *atpip1;4* single mutant (Tian *et al.*,  
491 2016); and only *AtPIP1;4* and *AtPIP1;3* are rapidly up-regulated in response to H<sub>2</sub>O<sub>2</sub> treatment of  
492 leaves (Hooijmaijers *et al.*, 2012). The latter would be a consistent response to the apoplastic H<sub>2</sub>O<sub>2</sub>  
493 produced upon pathogen recognition and facilitating its entry into the cell to trigger immune  
494 responses (Tian *et al.*, 2016). *AtPIP1;3* transcripts are not present in dry seed, but are substantially  
495 induced during seed imbibition and germination. Hydrating seed releases H<sub>2</sub>O<sub>2</sub> as a signal to promote  
496 germination, and may involve AtPIP1;3, which would be consistent with the involvement of AQPs in  
497 the germination process (Hoai *et al.*, 2020). Further investigation into a role for AtPIP1;3 in plant  
498 immunity and seed germination appears warranted.

#### 499 500 **AtPIP boric acid permeability**

501 Five AtPIPs were permeable to boric acid, with a ranking of AtPIP1;1 > AtPIP2;2 = AtPIP2;7 = AtPIP2;8  
502 > AtPIP1;5. Boric acid permeability is generally associated with NIP-type AQPs (Pommerrenig *et al.*,  
503 2015). However, a growing number of PIP isoforms from different species are being found capable of  
504 transporting boron in heterologous systems; ZmPIP1;1 (Dordas *et al.*, 2000), OsPIP1;3 and OsPIP2;6  
505 (Mosa *et al.*, 2016), OsPIP2;4 and OsPIP2;7 (Kumar *et al.*, 2014), and HvPIP1;3 and HvPIP1;4 (Fitzpatrick  
506 and Reid, 2009). A native physiological role for PIP boron transport is not yet confirmed in any species,  
507 but improved tolerance to boron toxicity in Arabidopsis over-expressing boron permeable rice PIPs,  
508 points towards a possible role (Kumar *et al.*, 2014, Mosa *et al.*, 2016).

509

510 Boron permeable AtPIPs are expressed in all tissue types and may help coordinate uptake and  
511 distribution of this essential micronutrient, and provide tolerance via efflux under toxic  
512 concentrations. AtPIP1;1 was an efficient boron transporter, but not its paralog AtPIP1;2. *AtPIP1;1*  
513 expression is unaltered in roots and minimally in shoots under toxic boron conditions, whereas  
514 *AtPIP1;2* is substantially repressed (Macho-Rivero *et al.*, 2018). *AtPIP1;1* which is permeable to boron,  
515 is predominantly expressed in roots and differentially expressed in response to boron. This suggests  
516 it has undergone substantial functional diversification since duplication with *AtPIP1;2*. *AtPIP1;2* is  
517 widely and highly expressed and facilitates CO<sub>2</sub> diffusion into chloroplasts for photosynthesis  
518 (Heckwolf *et al.*, 2011), whereas we suggest AtPIP1;1 may be specialized for micronutrient uptake  
519 from the soil.

520

#### 521 **AtPIP urea permeability**

522 Urea differs massively from water with respect to size, polarity and other physicochemical properties.  
523 No AtPIP was capable of permeating urea, which is consistent with urea being too large to pass  
524 through the narrow aperture of the AtPIP a/R filter (Supplemental Table S2)(Dynowski *et al.*, 2008a,  
525 Dynowski *et al.*, 2008b).

526

#### 527 **AtPIP Na<sup>+</sup> permeability**

528 Yeast tolerance of salt toxicity is associated with osmo-resistance (Stratford *et al.*, 2019), meaning that  
529 AtPIP water transport could confound growth data for AtPIP expressing yeast grown at high salt  
530 concentrations. Therefore, assessment of AtPIP Na<sup>+</sup> permeability from yeast growth requires a  
531 tailored mutant (Sychrova, 2004). Instead, to screen for AtPIP Na<sup>+</sup> permeability, we quantified  
532 intracellular yeast Na<sup>+</sup> content directly. We confirmed previous reports of Na<sup>+</sup> permeability for  
533 AtPIP2;1 and AtPIP2;2 (Byrt *et al.*, 2017, Qiu *et al.*, 2020), and observed that AtPIP2;6 and AtPIP2;7  
534 also appear permeable to Na<sup>+</sup>. The latter is at odds with previous electrophysiological experiments  
535 on *AtPIP2;7* expressing oocytes that report AtPIP2;7 is not permeable to Na<sup>+</sup> (Kourghi *et al.*, 2017).  
536 The contrasting findings could reflect different heterologous expression systems and detection  
537 techniques, but investigation of post-translational regulation of AtPIP2;7 function is warranted.

538

539 We observed no enhanced Na<sup>+</sup> accumulation in yeast expressing AtPIP1s alone. Since the central pore,  
540 formed in the middle of tetrameric AQP complex, is the pathway for monovalent ions (Yool and  
541 Weinstein, 2002), we did not screen yeast co-expressing AtPIP1s with AtPIP2;5. This would change the  
542 structure of the central pore and make interpretation of results ambiguous, as seen for CO<sub>2</sub> and Na<sup>+</sup>  
543 transport through the central pore of PIP hetero-tetramers (Otto *et al.*, 2010, Byrt *et al.*, 2017).

544

545 The dual permeability to water and solutes of certain AtPIPs may help build high turgor during cell  
546 expansion. For example, AtPIP2;1 is involved in lateral root emergence where the primordia pushes  
547 through the overlying tissues (Péret *et al.*, 2012). Our observations that AtPIP2;7 has dual water and  
548 solute transport capacity and is upregulated during seed imbibition and germination, implies a role  
549 aiding the massive influx of water needed for the radicle to puncture through the seed coat.  
550 Moreover, expression of *AtPIP2;7* in seeds responds to two antagonistically acting phytohormones  
551 (GA and ABA) that regulate seed dormancy versus germination (Hoai *et al.*, 2020).

552

#### 553 **Why the differences in efficiency between isoforms?**

554 We observed differences among AtPIPs in their efficiency to transport water and H<sub>2</sub>O<sub>2</sub> and capability  
555 to permeate boric acid or Na<sup>+</sup>. This is puzzling given the near identical residue signatures of motifs  
556 classically considered to govern substrate selectivity (i.e. NPA, ar/R, and Froger's positions)  
557 (Supplemental Table S2; Figure S10), and indicates the involvement of other domains yet to be  
558 defined. Variation in transport efficiency for water and H<sub>2</sub>O<sub>2</sub> is likely to be associated with subtle  
559 differences in residues forming the monomeric pore that alter the number of hydrogen bonds with  
560 the substrate, or that shift, even slightly, the spatial configuration of the pore diameter (Horner *et al.*,

561 2015, Mom *et al.*, 2021). Differences in the sensitivity of gating regulation and the degree of  
562 'openness' or 'open probability' is another possible factor (Kourghi *et al.*, 2017, Vitali *et al.*, 2019, Qiu  
563 *et al.*, 2020). Na<sup>+</sup> transport was only detected for some AtPIPs, pointing to differences in central pore  
564 features (Yool and Weinstein, 2002). The route for boric acid through PIPs is unknown, but mutant  
565 analysis suggests the monomeric pore is most likely (Dynowski *et al.*, 2008b). However, we cannot  
566 exclude the central pore given its hydrophobic profile and hypothesized ability to open wider through  
567 helix rotation (Tyerman *et al.*, 2021). Structural changes to the central pore of hetero-tetramers would  
568 also account for the inability to improve AtPIP1;1 and AtPIP1;5 boric acid permeability when co-  
569 expressed with AtPIP2;5.

570

571 The limited sequence differences between the AtPIPs (Supplemental Figure S10), should make  
572 identification of substrate specificity residues easier and feasible to explore through mutation  
573 approaches.

574

## 575 **Conclusion**

576 Using a micro-volume yeast-based system we developed comparative substrate permeability profiles  
577 for the entire AtPIP subfamily. The validity of our micro-volume yeast system was assured by bench-  
578 marking against published AtPIP permeability data from different systems. Comparison between  
579 AtPIP isoforms and across multiple substrates allowed for more informative conclusions. For example,  
580 although AtPIP2;6 was permeable to water, it was an inefficient H<sub>2</sub>O<sub>2</sub> transporter.

581

582 Our substrate profiles align with known biological roles of AtPIPs and will help uncover further  
583 physiological roles obscured by genetic redundancy. The rich resources in Arabidopsis (mutants,  
584 expression data, physiological studies etc.) should allow evaluation of permeability profiles and reveal  
585 physiological significance more readily than in other species.

586

587 Transgenic manipulation of AQPs to improve yield or stress tolerance in various plant species has  
588 mixed outcomes (Chaumont and Tyerman, 2017). Neutral or negative phenotypes could be related  
589 to off-target substrate transport through the manipulated AQP, or insufficient transport efficiency to  
590 yield a desirable effect. Broader comparative profiling would provide a vital strategic tool for selecting  
591 'better' candidates towards fit-for-purpose translational AQP applications. For example, using  
592 AtPIP2;4 over AtPIP2;7 for more exclusive water permeability, or using AtPIP1;3 if highly efficient H<sub>2</sub>O<sub>2</sub>  
593 transport is required over water.

594

595 Microplate readers suitable for AQP yeast assays are becoming readily affordable, which should favour  
596 the use of liquid cultures over solid medium for growth evaluations. Our system can be expanded to  
597 other AQP types. Building a catalogue of transport capacity from a large number of AQPs will help  
598 clarify biological roles and decipher the nuanced characteristics of transport selectivity and efficiency  
599 necessary for future engineering of AQPs for specific biotechnological applications.

600

601

## 602 **Materials and methods**

603 Detailed material and methods are provided as Supplemental Information. Briefly, *AtPIP* and control  
604 gene coding sequences were commercially synthesised (Genscript) as gateway-enabled entry  
605 constructs and cloned into destination vectors from the Advanced Gateway® series of yeast  
606 expression plasmids (Alberti *et al.*, 2007) to create the various yeast expression clones. These were  
607 transformed into appropriate yeast strains using Frozen-EZ yeast Transformation Kit II (Zymo  
608 Research). *AtPIP-GFP* were used to evaluate heterologous AtPIP production, with GFP signal detected  
609 in concentrated yeast cultures using the Infinite M1000 Pro plate reader (TECAN). Subcellular  
610 localization in yeast cells was performed using confocal microscopy on a Zeiss LSM780 confocal laser-  
611 scanning microscope (Carl Zeiss) operated by Zen Black software. Quantification of AtPIP2;5



612 interactions with AtPIP1 proteins using the Y2H mbSUS was performed as per (Grefen *et al.*, 2007).  
613 Yeast spheroplasts were generated using zymolyase digestion (Zymo Research) and spheroplast  
614 bursting due to osmotic shock measured using a Cary 60 UV-VIS (Agilent) spectrophotometer with  
615 OD<sub>650</sub> reading at 0.1 sec intervals. Micro-volume yeast cultures were cultivated and OD readings  
616 measured using a Spectrostar Nano microplate reader (BMG, Germany) in Nunc-96 400 µL flat bottom  
617 untreated 96-well plates (Thermo Scientific Cat#243656) with lid and 200µl culture volume per well.  
618 Default cycling conditions for yeast growth assays were: 250 cycles at 10 mins per cycle (total time  
619 ~42-50 hrs); incubated at 30°C with a slightly warmer lid; shaking frequency of 400 rpm in double  
620 orbital shaking mode; 5 mins shaking per cycle prior to the OD reading, with the remaining time the  
621 plate sitting idle on the incubation plate; OD readings invoke orbital averaging at scan diameter of  
622 4mm and 22 flashes per well, recording at 650nm. OD<sub>650</sub> readings minus the blank were corrected for  
623 non-linearity using our pre-determined calibration function to generate <sup>Corr</sup>OD<sub>650</sub> at a 1cm path-  
624 length, the data was converted into growth curves that were smoothed using several filters and finally  
625 log (LN) transformed using <sup>Corr</sup>OD<sub>650</sub> at time 't' divided by the initial starting OD (<sup>Corr</sup>OD<sub>i</sub>). Specifics of  
626 freeze-thaw, H<sub>2</sub>O<sub>2</sub>, boric acid, urea, and NaCl treatments are detailed in Supplemental Materials and  
627 Methods.

628  
629

### 630 Acknowledgements

631 The authors acknowledge the facilities and the scientific and technical assistance of Darryl Webb of  
632 Microscopy Australia at the Advanced Imaging Precinct at the Australian National University; a facility  
633 funded by the ANU, and State and Federal Governments of Australia. We also thank Peter Dahl of the  
634 S. Hohmann lab, for providing us the 10560-6B wild type and *aqy1 aqy2* mutant yeast strains. Gerd P.  
635 Bienert for supplying the *ynvw1* yeast mutant. Christopher Grefen for components of the Y2H mbSUS.

636

### 637 Legends

638

639 **Figure 1. Yeast micro-cultivation setup and growth data outputs.** **A**, Optimised micro-cultivation  
640 conditions produce repeatable growth curves of replicate cultures spaced across a 96-well plate. The  
641 growth curves of recorded OD values are compressed due to the progressive non-linear response of  
642 optical detection. Applying a calibration function produces corrected OD values (<sup>Corr</sup>OD) and a more  
643 accurate representative growth curve. **B**, A yeast population growth curve ( $\text{Ln } \frac{\text{Corr} \cdot \text{OD}_t}{\text{Corr} \cdot \text{OD}_i}$ )  
644 depicting the three major derived growth traits ( $\lambda$ ,  $\mu$ , and  $\kappa$ ) and the dynamic standardizing measuring  
645 point, Phi ( $\phi$ ). **C**, Conceptual examples demonstrating the use of Area Under the Curve (AUC) as a  
646 measure of cumulative growth differences. Untreated yeast population growth (black) and two  
647 treatment growth scenarios (blue and red).  $\Phi$  is allocated to the untreated growth curve. The red  
648 curve shows a slightly longer lag phase ( $\Delta\lambda$ ), reduced maximum rate of growth ( $\Delta\mu$ ; differences  
649 between yellow dotted tangent lines), and lower carrying capacity ( $\Delta\kappa$ ), captured as a substantially  
650 reduced AUC (shading) than that of the untreated black curve. The blue curve shows a longer lag  
651 phase, but growth rate and carrying capacity similar to untreated. No AUC is detected at  $\phi$ , but AUC  
652 can be detected by shifting to  $\phi_{+t}$  (note:  $\Delta\text{AUC}$  will be less (underestimated) when using  $\phi_{+t}$  as control  
653 population has ceased growing).

654

655 **Figure 2. Sub-cellular localisation of AtPIPs in yeast.** Confocal microscopy images of: **A**, an eGFP only  
656 control showing diffuse cytosolic localised signal. **B**, SEC63::RFP endoplasmic reticulum (ER) marker  
657 showing the prominent nuclear envelope ER domain (nER) and a peripheral or cortical ER domain  
658 (cER). The cER lies just beneath the plasma membrane but is not continuous around the perimeter  
659 with gaps distinguishing it from plasma membrane localisation (solid triangles). Cytoplasmic tubules  
660 link the two ER domains (\*). **E, F, I, J, M, N, Q and R**, AtPIP2-eGFP proteins expressed alone  
661 predominantly localise in a distinct continuous ring of signal around the cell perimeter coinciding with  
662 the plasma membrane. In several cases, eGFP signal can also be detected in internal storage vacuoles.



663 **C, G, K, O and S**, AtPIP1-eGFP proteins expressed alone localise to the nER, ER tubules and a patchy  
664 cER signal overlaying PM localisation. **D, H, L, P and T**, AtPIP1-eGFP proteins co-expressed with  
665 AtPIP2;5 with the majority of the fluorescence signal localised to the PM, similar to AtPIP2 proteins.  
666 Fluorescence signal false colored red for marker lines in A and B, and green for AtPIP-GFP lines in C-T.  
667

668 **Figure 3. A**, Illustration of mbSUS yeast two-hybrid system. The mutant N-terminal ubiquitin domain  
669 (NubG) and C-terminal ubiquitin domain (Cub) can reconstitute the full-length ubiquitin protein (UBQ)  
670 only when brought into close proximity via a membrane bound and interacting Bait and Prey protein  
671 combination. The reconstituted UBQ is recognised by Ubiquitin-Specific Proteases (USP), releasing  
672 the artificial transcription factor PLV (proteinA-LexA-VP16) that is translationally fused to the Cub  
673 domain. The freed PLV then enters the nucleus and activates the *LacZ* reporter gene that encodes for  
674 a  $\beta$ -galactosidase. **B**, AtPIP2;5 is capable of strong protein-protein interactions with each of the AtPIP1  
675 isoforms. The intensity of the AtPIP2;5 (bait) and AtPIP1 (prey) interaction was assayed by measuring  
676  $\beta$ -galactosidase activity via colorimetric monitoring of o-nitrophenyl- $\beta$ -D-galactoside (ONPG)  
677 conversion to the yellow o-nitrophenol. Control lines: NubG (pNX35-DEST), a mutant Nub variant  
678 with low affinity for Cub. When linked to plasma membrane localizing Arabidopsis ROP6 or KAT1  
679 proteins, it acts as a prey control reporting incidental UBQ reconstitution through simple random close  
680 insertion of abundantly produced membrane bound proteins. NubG expressed alone should not  
681 interact with Cub and negligible reporter activity was observed. NubWT (pNubWTXgate) is a soluble  
682 cytoplasmic localized N-terminal ubiquitin domain with a high affinity for Cub and acts as a positive  
683 control able to interact with the Cub domain of AtPIP2;5-Cub independent of bait interaction. The  
684 detected activity (orange) demonstrates that the Cub domain fused to AtPIP2;5 was accessible to Nub  
685 and USPs. Each of the AtPIP2;5 + AtPIP1 interactions (blue) significantly exceeded spurious background  
686 levels (red). All error bars are SEM. ANOVA post-hoc Fisher's LSD versus ATPIP2;5 + KAT1, \*  $p < 0.05$ ,  
687 \*\*  $p < 0.01$ . N = 4 biological reps over 2 experimental runs.  
688

689 **Figure 4. Water permeability assays using two freeze-thaw cycles with yeast expressing different**  
690 **AQP genes. A**, Illustrative growth curves for untreated controls and following two freeze-thaw cycles.  
691 **B**, Relative AUC for the 13 AtPIP isoforms, calculated with  $\phi$ . **C**, Relative AUC after extended growth  
692 with AUC calculated at  $\phi+1000$ . **D**, Relative AUC for AtPIP1s expressed singly or co-expressed with  
693 AtPIP2;5. **E**, Change in OD of yeast spheroplast suspensions following osmotic shock. The contribution  
694 of the rapid initial phase (value in parentheses) reflects the permeability derived from fitted two-phase  
695 exponential curves; empty vector:  $y = [0.00881 \times e^{(-x/0.243)}] + [-0.05398 \times e^{(-x/-6.47128)}]$ ; AtPIP1;5:  $y =$   
696  $[0.02937 \times e^{(-x/0.09966)}] + [0.13874 \times e^{(-x/3.76055)}]$ ; AtPIP2;1:  $y = [0.10037 \times e^{(-x/0.15797)}] + [0.10763 \times e^{(-x/3.51469)}]$ ;  
697 AtPIP2;7:  $y = [0.16814 \times e^{(-x/0.18973)}] + [0.07791 \times e^{(-x/2.43538)}]$ . All error bars are SEM. For B-C, asterisks  
698 indicate statistical difference from empty vector control, ANOVA with Fishers LSD test (\*  $P < 0.05$ ; \*\*  
699  $P < 0.01$ ); letters denote different statistical rankings, ANOVA with Tukey's test ( $P < 0.05$ ). For D, letters  
700 denote different statistical groupings, lowercase among single expressed and uppercase among co-  
701 expressed AtPIP yeast lines, ANOVA with Tukey's test ( $P < 0.05$ ). N = 12 (AtPIP1s) and 8 (AtPIP2s)  
702 across 4 experimental runs for B and C. N = 6 across 3 experimental runs for D. N = 6 across 2  
703 experimental runs for E.  
704

705 **Figure 5. H<sub>2</sub>O<sub>2</sub> permeability assays. A**, Comparison of growth curves of two yeast strains, *aqy1 aqy2*  
706 or *skn7*, exposed to increasing H<sub>2</sub>O<sub>2</sub> concentrations. **B**, Dose response curves showing relative AUC as  
707 a function of H<sub>2</sub>O<sub>2</sub> concentration for each strain. *skn7* yeast are more sensitive to H<sub>2</sub>O<sub>2</sub> treatment than  
708 *aqy1 aqy2* yeast. Red arrows indicate H<sub>2</sub>O<sub>2</sub> concentrations chosen for testing yeast expressing *AtPIP*.  
709 **C**, Relative AUC for *aqy1 aqy2* yeast expressing each *AtPIP* gene exposed to 1mM H<sub>2</sub>O<sub>2</sub>. **D**, Relative  
710 AUC for *skn7* yeast expressing *AtPIP* genes exposed to 1mM H<sub>2</sub>O<sub>2</sub>. **E**, Relative AUC for *skn7* yeast  
711 exposed to 0.5mM H<sub>2</sub>O<sub>2</sub> expressing *AtPIP1* singly (grey) or together with *AtPIP2;5* (blue). Each set is  
712 standardized to their respective empty vector control. **F**, Relative AUC for *skn7* yeast expressing  
713 various combinations of *AtPIP* genes at 0.25, 0.5 and 1mM H<sub>2</sub>O<sub>2</sub>. All error bars are SEM. For C and D,

714 asterisks indicate statistical difference from empty vector control, ANOVA with Fishers LSD test (\*  $P < 0.05$ ; \*\*  $P < 0.01$ ); letters denote different statistical rankings across both 0.5 and 1mM H<sub>2</sub>O<sub>2</sub>, ANOVA  
715 with Tukey's test ( $P < 0.05$ ). For E, asterisks indicate statistical difference from empty vector control, ANOVA with Fishers LSD test (\*  $P < 0.05$ ; \*\*  $P < 0.01$ ); chevrons (^) indicate statistical difference  
716 between single vs. co-expression (Student's  $t$  test  $P < 0.01$ ). For F, color coded letters denote different statistical groupings within [H<sub>2</sub>O<sub>2</sub>] treatments, ANOVA with Fishers LSD test. N = 4 bio reps for B. N =  
717 ANOVA with Fishers LSD test (\*  $P < 0.05$ ; \*\*  $P < 0.01$ ); chevrons (^) indicate statistical difference  
718 between single vs. co-expression (Student's  $t$  test  $P < 0.01$ ). For F, color coded letters denote different  
719 statistical groupings within [H<sub>2</sub>O<sub>2</sub>] treatments, ANOVA with Fishers LSD test. N = 4 bio reps for B. N =  
720 6 (2 biological reps x 3 experimental runs) for C. N = 8 across 4 experimental runs for D. For E, N = 12  
721 across 6 experimental runs for single expressed AtPIPs and N = 6 across 3 experimental runs for co-  
722 expressed lines. N = 16 across 4 experimental runs for F.

723

724 **Figure 6. Boric acid permeability assays.** **A**, Growth curves for *aqy1 aqy2* yeast exposed to increasing  
725 concentrations of boric acid (BA). **B**, Dose response curve of relative AUC as a function of boric acid  
726 concentration. Red arrows denote BA concentrations chosen for testing yeast expressing *AtPIP*. **C**,  
727 Relative AUC for *aqy1 aqy2* yeast expressing each *AtPIP* gene exposed to 30mM boric acid, with  
728 *HvPIP1;4* as a boric acid permeable control. **D**, Relative AUC for *aqy1 aqy2* yeast expressing *AtPIP1*  
729 singly (grey) or together with *AtPIP2;5* (orange) at 30mM boric acid. Each set is standardized to their  
730 respective empty vector control. All error bars are SEM. For C, asterisks indicate statistical difference  
731 from empty vector control, ANOVA with Fishers LSD test (\*  $P < 0.05$ ; \*\*  $P < 0.01$ ); letters denote  
732 different statistical rankings across both 20 and 30mM boric acid, ANOVA with Tukey's test ( $P < 0.05$ ).  
733 For D, asterisks indicate statistical difference from respective empty vector control, ANOVA with  
734 Fishers LSD test (\*  $P < 0.05$ ; \*\*  $P < 0.01$ ); chevrons (^) indicate statistical difference between single vs.  
735 co-expression (Student's  $t$  test  $P < 0.01$ ). For C and D, N = 6 across 3 experimental runs.

736

737 **Figure 7. Urea permeability assays.** **A**, Growth curves of *ynvw1 (dur3)* yeast supplied with increasing  
738 concentrations of urea. **B**, Relative AUC as a function of urea concentration. Red arrows denote urea  
739 concentrations chosen for testing yeast expressing *AtPIP*. **C**, Relative AUC for yeast expressing each  
740 *AtPIP* grown with 4 or 12mM urea, with *AtTIP2;3* as a urea permeable control. All error bars are SEM.  
741 For C, asterisks indicate statistical difference from empty vector control, ANOVA with Fishers LSD test  
742 (\*  $P < 0.05$ ; \*\*  $P < 0.01$ ); letters denote statistical rankings across both 4 and 12mM urea, ANOVA with  
743 Tukey's test ( $P < 0.05$ ). For C, N = 6 across 3 experimental runs.

744

745 **Figure 8. Na<sup>+</sup> permeability assay.** Yeast cellular sodium content before (grey) and after (blue)  
746 exposure to 70mM NaCl for 40 mins. Error bars are SEM. Asterisks indicate statistical difference from  
747 empty vector control, ANOVA with Fishers LSD test (\*  $P < 0.05$ ; \*\*  $P < 0.01$ ). Chevrons (^) indicate  
748 statistical difference from empty vector control, Student's  $t$  test  $P < 0.05$ . N = 3 for AtPIPs and N = 2  
749 for empty vector.

750

751 **Figure 9. Summary of permeability and expression data for the AtPIP isoforms.** The phylogenetic  
752 relationship is shown on the left, followed by strength of integration into the plasma membrane (PM)  
753 when expressed singly or co-expressed with a PIP2 (PIP1s only). Substrate permeabilities are shown  
754 in the center, and relative gene expression across different tissues during development, are shown on  
755 the right. The phylogeny is full protein sequence, using neighbor-joining method from MUSCLE  
756 alignments of protein sequences, with confidence levels (%) of branch points generated through  
757 bootstrapping analysis (n = 1000). Permeability and transport efficiencies for AtPIP1 are based on co-  
758 expression with *AtPIP2;5* for water, H<sub>2</sub>O<sub>2</sub>, boric acid and urea (orange underline below *AtPIP1;5*) and  
759 singly expressed AtPIP1s for Na<sup>+</sup> permeability (blue line under *AtPIP1;5*).

760

761

## 762 Supplemental Data

763

764 **Supplemental Figure S1.** Adjusting for non-linearity of OD measurements at high cell density.

765  
766 **Supplemental Figure S2.** The highly active *GPD* promoter confers greater AQP enhanced water  
767 permeability over the less active *TPI1* promoter.

768  
769 **Supplemental Figure S3.** Quantification of AtPIP protein abundance in intact yeast.  
770

771 **Supplemental Figure S4.** Establishing the freeze-thaw assay for water permeability.  
772

773 **Supplemental Figure S5.** Calibrating H<sub>2</sub>O<sub>2</sub> treatments for yeast growth assay.  
774

775 **Supplemental Figure S6.** H<sub>2</sub>O<sub>2</sub> permeability assays.  
776

777 **Supplemental Figure S7.** Calibrating boric acid treatments for yeast growth assay.  
778

779 **Supplemental Figure S8.** Boric acid permeability assays.  
780

781 **Supplemental Figure S9.** Calibrating urea treatments for yeast growth assay.  
782

783 **Supplemental Figure S10.** AtPIP family protein sequence alignment.  
784

785 **Supplemental Figure S11.** Correlation analysis examining AtPIP induced changes in inherent yeast  
786 growth characteristics and possible indirect effects on response to treatments.  
787

788 **Supplemental Figure S12.** Growth curve processing.  
789

790 **Supplemental Figure S13.** Deriving  $\mu$ ,  $\lambda$ , and  $\kappa$ , from a processed growth curve.  
791

792 **Supplemental Table S1.** *AtPIP* codon compatibility for heterologous expression in yeast and growth  
793 characteristics of *AtPIP* expressing yeast lines.  
794

795 **Supplemental Table S2.** Protein domain lengths and amino acid composition of AtPIPs at known  
796 substrate selectivity positions and other important motifs.  
797

798

799

## 800 **References**

801

801 **Afzal, Z., Howton, T., Sun, Y. and Mukhtar, M.S.** (2016) The roles of aquaporins in plant stress  
802 responses. *Journal of developmental biology*, **4**, 9.

803 **Alberti, S., Gitler, A.D. and Lindquist, S.** (2007) A suite of Gateway® cloning vectors for high-  
804 throughput genetic analysis in *Saccharomyces cerevisiae*. *Yeast*, **24**, 913-919.

805 **Almasalmeh, A., Krenc, D., Wu, B. and Beitz, E.** (2014) Structural determinants of the hydrogen  
806 peroxide permeability of aquaporins. *The FEBS journal*, **281**, 647-656.

807 **Bienert, G.P., Bienert, M.D., Jahn, T.P., Boutry, M. and Chaumont, F.** (2011) Solanaceae XIPs are  
808 plasma membrane aquaporins that facilitate the transport of many uncharged substrates.  
809 *The Plant Journal*, **66**, 306-317.

810 **Bienert, G.P., Heinen, R.B., Berny, M.C. and Chaumont, F.** (2014) Maize plasma membrane  
811 aquaporin ZmPIP2; 5, but not ZmPIP1; 2, facilitates transmembrane diffusion of hydrogen  
812 peroxide. *Biochimica et Biophysica Acta (BBA)-Biomembranes*, **1838**, 216-222.

813 **Bienert, G.P., Møller, A.L., Kristiansen, K.A., Schulz, A., Møller, I.M., Schjoerring, J.K. and Jahn, T.P.**  
814 (2007) Specific aquaporins facilitate the diffusion of hydrogen peroxide across membranes.  
815 *Journal of Biological Chemistry*, **282**, 1183-1192.

- 816 **Bienert, G.P., Thorsen, M., Schüssler, M.D., Nilsson, H.R., Wagner, A., Tamás, M.J. and Jahn, T.P.**  
817 (2008) A subgroup of plant aquaporins facilitate the bi-directional diffusion of As (OH) 3 and  
818 Sb (OH) 3 across membranes. *BMC biology*, **6**, 1-15.
- 819 **Bill, R.M.** (2014) Playing catch-up with Escherichia coli: using yeast to increase success rates in  
820 recombinant protein production experiments. *Frontiers in microbiology*, **5**, 85.
- 821 **Byrt, C.S., Zhao, M., Kourghi, M., Bose, J., Henderson, S.W., Qiu, J., Gilliam, M., Schultz, C.,**  
822 **Schwarz, M. and Ramesh, S.A.** (2017) Non-selective cation channel activity of aquaporin  
823 AtPIP2; 1 regulated by Ca<sup>2+</sup> and pH. *Plant, Cell & Environment*, **40**, 802-815.
- 824 **Černý, M., Habánová, H., Berka, M., Luklová, M. and Brzobohatý, B.** (2018) Hydrogen peroxide: its  
825 role in plant biology and crosstalk with signalling networks. *International journal of*  
826 *molecular sciences*, **19**, 2812.
- 827 **Chaumont, F. and Tyerman, S.** (2017) *Plant Aquaporins*: Springer.
- 828 **Chevalier, A.S. and Chaumont, F.** (2015) Trafficking of plant plasma membrane aquaporins: multiple  
829 regulation levels and complex sorting signals. *Plant and Cell Physiology*, **56**, 819-829.
- 830 **De Rosa, A., Watson-Lazowski, A., Evans, J.R. and Groszmann, M.** (2020) Genome-wide  
831 identification and characterisation of Aquaporins in Nicotiana tabacum and their  
832 relationships with other Solanaceae species. *BMC Plant Biology*, **20**, 1-29.
- 833 **Dordas, C., Chrispeels, M.J. and Brown, P.H.** (2000) Permeability and channel-mediated transport of  
834 boric acid across membrane vesicles isolated from squash roots. *Plant physiology*, **124**, 1349-  
835 1362.
- 836 **Dynowski, M., Mayer, M., Moran, O. and Ludewig, U.** (2008a) Molecular determinants of ammonia  
837 and urea conductance in plant aquaporin homologs. *FEBS letters*, **582**, 2458-2462.
- 838 **Dynowski, M., Schaaf, G., Loque, D., Moran, O. and Ludewig, U.** (2008b) Plant plasma membrane  
839 water channels conduct the signalling molecule H<sub>2</sub>O<sub>2</sub>. *Biochem J*, **414**, 53-61.
- 840 **Fernandez-Ricaud, L., Kourtchenko, O., Zackrisson, M., Warringer, J. and Blomberg, A.** (2016)  
841 PRECOG: a tool for automated extraction and visualization of fitness components in  
842 microbial growth phenomics. *BMC bioinformatics*, **17**, 1-15.
- 843 **Fichman, Y., Myers, R.J., Grant, D.G. and Mittler, R.** (2021) Plasmodesmata-localized proteins and  
844 ROS orchestrate light-induced rapid systemic signaling in Arabidopsis. *Science Signaling*, **14**.
- 845 **Fitzpatrick, K.L. and Reid, R.J.** (2009) The involvement of aquaglyceroporins in transport of boron in  
846 barley roots. *Plant, cell & environment*, **32**, 1357-1365.
- 847 **Grefen, C., Lalonde, S. and Obrdlik, P.** (2007) Split-ubiquitin system for identifying protein-protein  
848 interactions in membrane and full-length proteins. *Current Protocols in Neuroscience*, **41**,  
849 5.27. 21-25.27. 41.
- 850 **Grondin, A., Rodrigues, O., Verdoucq, L., Merlot, S., Leonhardt, N. and Maurel, C.** (2015)  
851 Aquaporins contribute to ABA-triggered stomatal closure through OST1-mediated  
852 phosphorylation. *The Plant Cell*, **27**, 1945-1954.
- 853 **Groszmann, M., De Rosa, A., Ahmed, J., Chaumont, F. and Evans, J.R.** (2021) A consensus on the  
854 Aquaporin Gene Family in the Allotetraploid Plant, Nicotiana tabacum. *Plant Direct*, **5**,  
855 e00321.
- 856 **Groszmann, M., Osborn, H.L. and Evans, J.R.** (2017) Carbon dioxide and water transport through  
857 plant aquaporins. *Plant Cell Environ*, **40**, 938-961.
- 858 **Hachez, C., Laloux, T., Reinhardt, H., Cavez, D., Degand, H., Grefen, C., De Rycke, R., Inzé, D., Blatt,**  
859 **M.R. and Russinova, E.** (2014) Arabidopsis SNAREs SYP61 and SYP121 coordinate the  
860 trafficking of plasma membrane aquaporin PIP2; 7 to modulate the cell membrane water  
861 permeability. *The Plant Cell*, **26**, 3132-3147.
- 862 **Heckwolf, M., Pater, D., Hanson, D.T. and Kaldenhoff, R.** (2011) The Arabidopsis thaliana aquaporin  
863 AtPIP1; 2 is a physiologically relevant CO<sub>2</sub> transport facilitator. *The Plant Journal*, **67**, 795-  
864 804.
- 865 **Hélix-Nielsen, C.** (2018) Biomimetic membranes as a technology platform: Challenges and  
866 opportunities. *Membranes*, **8**, 44.



- 867 **Hoai, P.T.T., Tyerman, S.D., Schnell, N., Tucker, M., McGaughey, S.A., Qiu, J., Groszmann, M. and**  
868 **Byrt, C.S.** (2020) Deciphering aquaporin regulation and roles in seed biology. *Journal of*  
869 *Experimental Botany*, 10.1093/jxb/erz1555.
- 870 **Hooijmaijers, C., Rhee, J.Y., Kwak, K.J., Chung, G.C., Horie, T., Katsuhara, M. and Kang, H.** (2012)  
871 Hydrogen peroxide permeability of plasma membrane aquaporins of *Arabidopsis thaliana*.  
872 *Journal of plant research*, **125**, 147-153.
- 873 **Horner, A., Zocher, F., Preiner, J., Ollinger, N., Siligan, C., Akimov, S.A. and Pohl, P.** (2015) The  
874 mobility of single-file water molecules is governed by the number of H-bonds they may form  
875 with channel-lining residues. *Science advances*, **1**, e1400083.
- 876 **Hung, C.-W., Martínez-Márquez, J.Y., Javed, F.T. and Duncan, M.C.** (2018) A simple and inexpensive  
877 quantitative technique for determining chemical sensitivity in *Saccharomyces cerevisiae*.  
878 *Scientific reports*, **8**, 1-16.
- 879 **Jafarnejad, S.** (2020) Forward osmosis membrane technology for nutrient removal/recovery from  
880 wastewater: Recent advances, proposed designs, and future directions. *Chemosphere*,  
881 128116.
- 882 **Javot, H., Lauvergeat, V., Santoni, V., Martin-Laurent, F., Güçlü, J., Vinh, J., Heyes, J., Franck, K.I.,**  
883 **Schäffner, A.R. and Bouchez, D.** (2003) Role of a single aquaporin isoform in root water  
884 uptake. *The plant cell*, **15**, 509-522.
- 885 **Jozefkowicz, C., Berny, M.C., Chaumont, F. and Alleva, K.** (2017) Heteromerization of plant  
886 aquaporins. In *Plant Aquaporins*: Springer, pp. 29-46.
- 887 **Kaldenhoff, R., Kai, L. and Uehlein, N.** (2014) Aquaporins and membrane diffusion of CO<sub>2</sub> in living  
888 organisms. *Biochimica et Biophysica Acta (BBA)-General Subjects*, **1840**, 1592-1595.
- 889 **Kammerloher, W., Fischer, U., Piechottka, G.P. and Schäffner, A.R.** (1994) Water channels in the  
890 plant plasma membrane cloned by immunoselection from a mammalian expression system.  
891 *The Plant Journal*, **6**, 187-199.
- 892 **Kourghi, M., Nourmohammadi, S., Pei, J.V., Qiu, J., McGaughey, S., Tyerman, S.D., Byrt, C.S. and**  
893 **Yool, A.J.** (2017) Divalent cations regulate the ion conductance properties of diverse classes  
894 of aquaporins. *International journal of molecular sciences*, **18**, 2323.
- 895 **Kumar, K., Mosa, K.A., Chhikara, S., Musante, C., White, J.C. and Dhankher, O.P.** (2014) Two rice  
896 plasma membrane intrinsic proteins, OsPIP2; 4 and OsPIP2; 7, are involved in transport and  
897 providing tolerance to boron toxicity. *Planta*, **239**, 187-198.
- 898 **Laloux, T., Junqueira, B., Maistriau, L.C., Ahmed, J., Jurkiewicz, A. and Chaumont, F.** (2018) Plant  
899 and mammal aquaporins: same but different. *International journal of molecular sciences*, **19**,  
900 521.
- 901 **Macho-Rivero, M.A., Herrera-Rodríguez, M.B., Brejcha, R., Schäffner, A.R., Tanaka, N., Fujiwara, T.,**  
902 **González-Fontes, A. and Camacho-Cristóbal, J.J.** (2018) Boron toxicity reduces water  
903 transport from root to shoot in *Arabidopsis* plants. Evidence for a reduced transpiration rate  
904 and expression of major PIP aquaporin genes. *Plant and Cell Physiology*, **59**, 841-849.
- 905 **Madeira, A., Moura, T.F. and Soveral, G.** (2016) Detecting aquaporin function and regulation.  
906 *Frontiers in chemistry*, **4**, 3.
- 907 **Mao, Z. and Sun, W.** (2015) *Arabidopsis* seed-specific vacuolar aquaporins are involved in  
908 maintaining seed longevity under the control of ABSCISIC ACID INSENSITIVE 3. *Journal of*  
909 *Experimental Botany*, **66**, 4781-4794.
- 910 **Marešová, L. and Sychrová, H.** (2007) Applications of a microplate reader in yeast physiology  
911 research. *Biotechniques*, **43**, 667-672.
- 912 **Maurel, C., Boursiac, Y., Luu, D.-T., Santoni, V., Shahzad, Z. and Verdoucq, L.** (2015) Aquaporins in  
913 plants. *Physiological reviews*, **95**, 1321-1358.
- 914 **Mom, R., Muries, B., Benoit, P., Robert-Paganin, J., Réty, S., Venisse, J.s., Pádua, A., Label, P. and**  
915 **Auguin, D.** (2021) Voltage-gating of aquaporins, a putative conserved safety mechanism  
916 during ionic stresses. *FEBS letters*, **595**, 41-57.



- 917 **Mosa, K.A., Kumar, K., Chhikara, S., Musante, C., White, J.C. and Dhankher, O.P.** (2016) Enhanced  
918 boron tolerance in plants mediated by bidirectional transport through plasma membrane  
919 intrinsic proteins. *Scientific reports*, **6**, 1-14.
- 920 **Öberg, F., Ekvall, M., Nyblom, M., Öberg, F., Ekvall, M., Nyblom, M., Backmark, A., Neutze, R. and**  
921 **Hedfalk, K.** (2009) Insight into factors directing high production of eukaryotic membrane  
922 proteins; production of 13 human AQPs in *Pichia pastoris*. *Molecular membrane biology*, **26**,  
923 215-227.
- 924 **Otto, B., Uehlein, N., Sdorra, S., Fischer, M., Ayaz, M., Belastegui-Macadam, X., Heckwolf, M.,**  
925 **Lachnit, M., Pede, N. and Priem, N.** (2010) Aquaporin tetramer composition modifies the  
926 function of tobacco aquaporins. *Journal of Biological Chemistry*, **285**, 31253-31260.
- 927 **Péret, B., Li, G., Zhao, J., Band, L.R., Voß, U., Postaire, O., Luu, D.-T., Da Ines, O., Casimiro, I. and**  
928 **Lucas, M.** (2012) Auxin regulates aquaporin function to facilitate lateral root emergence.  
929 *Nature cell biology*, **14**, 991-998.
- 930 **Pommerrenig, B., Diehn, T.A. and Bienert, G.P.** (2015) Metalloido-porins: Essentiality of Nodulin 26-  
931 like intrinsic proteins in metalloid transport. *Plant Science*, **238**, 212-227.
- 932 **Prado, K., Boursiac, Y., Tournaire-Roux, C., Monneuse, J.-M., Postaire, O., Da Ines, O., Schäffner,**  
933 **A.R., Hem, S., Santoni, V. and Maurel, C.** (2013) Regulation of Arabidopsis leaf hydraulics  
934 involves light-dependent phosphorylation of aquaporins in veins. *The Plant Cell*, **25**, 1029-  
935 1039.
- 936 **Qiu, J., McGaughey, S.A., Groszmann, M., Tyerman, S.D. and Byrt, C.S.** (2020) Phosphorylation  
937 influences water and ion channel function of AtPIP2; 1. *Plant, Cell & Environment*, **43**, 2428-  
938 2442.
- 939 **Rhee, J., Horie, T., Sasano, S., Nakahara, Y. and Katsuhara, M.** (2017) Identification of an H<sub>2</sub>O<sub>2</sub>  
940 permeable PIP aquaporin in barley and a serine residue promoting H<sub>2</sub>O<sub>2</sub> transport.  
941 *Physiologia plantarum*, **159**, 120-128.
- 942 **Rodrigues, O., Reshetnyak, G., Grondin, A., Saijo, Y., Leonhardt, N., Maurel, C. and Verdoucq, L.**  
943 (2017) Aquaporins facilitate hydrogen peroxide entry into guard cells to mediate ABA- and  
944 pathogen-triggered stomatal closure. *Proceedings of the National Academy of Sciences*, **114**,  
945 9200-9205.
- 946 **Sade, N., Shatil-Cohen, A., Attia, Z., Maurel, C., Boursiac, Y., Kelly, G., Granot, D., Yaaran, A.,**  
947 **Lerner, S. and Moshelion, M.** (2014) The role of plasma membrane aquaporins in regulating  
948 the bundle sheath-mesophyll continuum and leaf hydraulics. *Plant Physiol*, **166**, 1609-1620.
- 949 **Singh, R.K., Deshmukh, R., Muthamilarasan, M., Rani, R. and Prasad, M.** (2020) Versatile roles of  
950 aquaporin in physiological processes and stress tolerance in plants. *Plant Physiology and*  
951 *Biochemistry*, **149**, 178-189.
- 952 **Sonah, H., Deshmukh, R.K., Labbé, C. and Bélanger, R.R.** (2017) Analysis of aquaporins in  
953 Brassicaceae species reveals high-level of conservation and dynamic role against biotic and  
954 abiotic stress in canola. *Scientific reports*, **7**, 1-17.
- 955 **Sorieul, M., Santoni, V., Maurel, C. and Luu, D.T.** (2011) Mechanisms and effects of retention of  
956 over-expressed aquaporin AtPIP2; 1 in the endoplasmic reticulum. *Traffic*, **12**, 473-482.
- 957 **Stevenson, K., McVey, A.F., Clark, I.B., Swain, P.S. and Pilizota, T.** (2016) General calibration of  
958 microbial growth in microplate readers. *Scientific reports*, **6**, 1-7.
- 959 **Stratford, M., Steels, H., Novodvorska, M., Archer, D.B. and Avery, S.V.** (2019) Extreme  
960 osmotolerance and halotolerance in food-relevant yeasts and the role of glycerol-dependent  
961 cell individuality. *Frontiers in microbiology*, **9**, 3238.
- 962 **Sychrova, H.** (2004) Yeast as a model organism to study transport and homeostasis of alkali metal  
963 cations. *Physiological research*, **53**, S91-98.
- 964 **Tang, C., Wang, Z., Petrinić, I., Fane, A.G. and Hélix-Nielsen, C.** (2015) Biomimetic aquaporin  
965 membranes coming of age. *Desalination*, **368**, 89-105.

- 966 **Tanghe, A., Van Dijck, P., Colavizza, D. and Thevelein, J.M.** (2004) Aquaporin-mediated  
967 improvement of freeze tolerance of *Saccharomyces cerevisiae* is restricted to rapid freezing  
968 conditions. *Applied and environmental microbiology*, **70**, 3377-3382.
- 969 **Tanghe, A., Van Dijck, P., Dumortier, F., Teunissen, A., Hohmann, S. and Thevelein, J.M.** (2002)  
970 Aquaporin expression correlates with freeze tolerance in baker's yeast, and overexpression  
971 improves freeze tolerance in industrial strains. *Applied and Environmental Microbiology*, **68**,  
972 5981-5989.
- 973 **Tian, S., Wang, X., Li, P., Wang, H., Ji, H., Xie, J., Qiu, Q., Shen, D. and Dong, H.** (2016) Plant  
974 aquaporin AtPIP1; 4 links apoplastic H<sub>2</sub>O<sub>2</sub> induction to disease immunity pathways. *Plant*  
975 *physiology*, **171**, 1635-1650.
- 976 **To, J., Yeo, C.Y., Soon, C.H. and Torres, J.** (2015) A generic high-throughput assay to detect  
977 aquaporin functional mutants: potential application to discovery of aquaporin inhibitors.  
978 *Biochimica et Biophysica Acta (BBA)-General Subjects*, **1850**, 1869-1876.
- 979 **Tournaire-Roux, C., Sutka, M., Javot, H., Gout, E., Gerbeau, P., Luu, D.-T., Blligny, R. and Maurel, C.**  
980 (2003) Cytosolic pH regulates root water transport during anoxic stress through gating of  
981 aquaporins. *Nature*, **425**, 393-397.
- 982 **Toussaint, M., Levasseur, G., Gervais-Bird, J., Wellinger, R.J., Abou Elela, S. and Conconi, A.** (2006)  
983 A high-throughput method to measure the sensitivity of yeast cells to genotoxic agents in  
984 liquid cultures. *Mutation Research/Genetic Toxicology and Environmental Mutagenesis*, **606**,  
985 92-105.
- 986 **Tyerman, S.D., McGaughey, S.A., Qiu, J., Yool, A.J. and Byrt, C.S.** (2021) Adaptable and  
987 multifunctional ion-conducting aquaporins. *Annual Review of Plant Biology*, **72**.
- 988 **Verdoucq, L., Grondin, A. and Maurel, C.** (2008) Structure–function analysis of plant aquaporin At  
989 PIP2; 1 gating by divalent cations and protons. *Biochem J*, **415**, 409-416.
- 990 **Vitali, V., Jozefkowicz, C., Canessa Fortuna, A., Soto, G., González Flecha, F.L. and Alleva, K.** (2019)  
991 Cooperativity in proton sensing by PIP aquaporins. *The FEBS journal*, **286**, 991-1002.
- 992 **Wang, H., Schoebel, S., Schmitz, F., Dong, H. and Hedfalk, K.** (2020a) Characterization of aquaporin-  
993 driven hydrogen peroxide transport. *Biochimica et Biophysica Acta (BBA)-Biomembranes*,  
994 **1862**, 183065.
- 995 **Wang, H., Zhang, L., Tao, Y., Wang, Z., Shen, D. and Dong, H.** (2019) Transmembrane Helices 2 and 3  
996 Determine the Localization of Plasma Membrane Intrinsic Proteins in Eukaryotic Cells.  
997 *Frontiers in plant science*, **10**, 1671.
- 998 **Wang, Y., Zhao, Z., Liu, F., Sun, L. and Hao, F.** (2020b) Versatile Roles of Aquaporins in Plant Growth  
999 and Development. *International journal of molecular sciences*, **21**, 9485.
- 1000 **Warringer, J. and Blomberg, A.** (2003) Automated screening in environmental arrays allows analysis  
1001 of quantitative phenotypic profiles in *Saccharomyces cerevisiae*. *Yeast*, **20**, 53-67.
- 1002 **Windari, E.A., Ando, M., Mizoguchi, Y., Shimada, H., Ohira, K., Kagaya, Y., Higashiyama, T.,**  
1003 **Takayama, S., Watanabe, M. and Suwabe, K.** (2021) Two aquaporins, SIP1; 1 and PIP1; 2,  
1004 mediate water transport for pollen hydration in the *Arabidopsis* pistil. *Plant Biotechnology*,  
1005 **38**, 77-87.
- 1006 **Yanef, A., Vitali, V. and Amodeo, G.** (2015) PIP1 aquaporins: intrinsic water channels or PIP2  
1007 aquaporin modulators? *FEBS letters*, **589**, 3508-3515.
- 1008 **Yool, A.J. and Weinstein, A.M.** (2002) New roles for old holes: ion channel function in aquaporin-1.  
1009 *Physiology*, **17**, 68-72.
- 1010 **Yu, J., Yool, A.J., Schulten, K. and Tajkhorshid, E.** (2006) Mechanism of gating and ion conductivity  
1011 of a possible tetrameric pore in aquaporin-1. *Structure*, **14**, 1411-1423.
- 1012

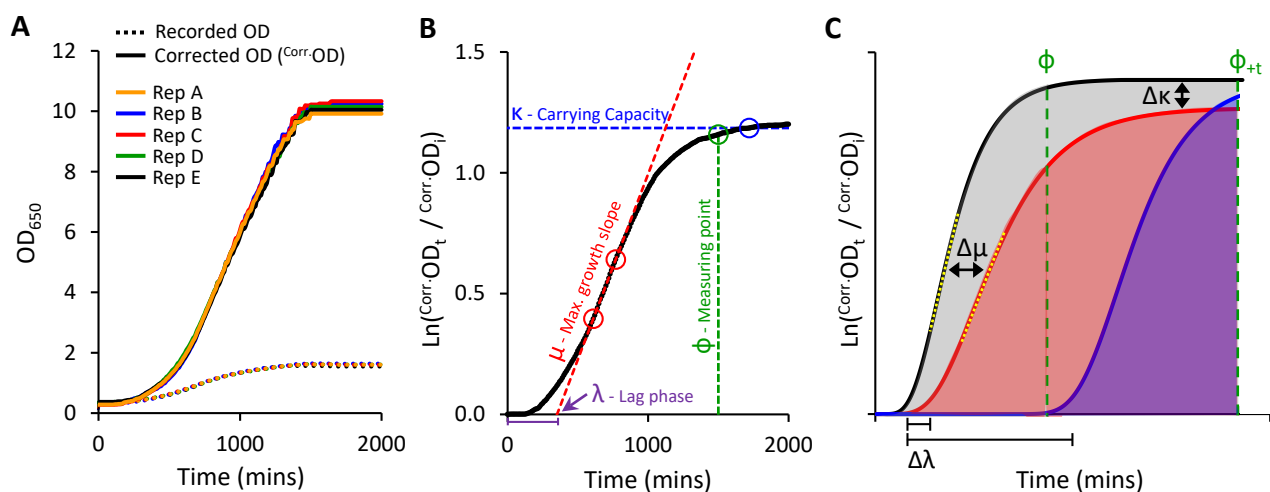

**Figure 1. Yeast micro-cultivation setup and growth data outputs.** **A**, Optimised micro-cultivation conditions produce repeatable growth curves of replicate cultures spaced across a 96-well plate. The growth curves of recorded OD values are compressed due to the progressive non-linear response of optical detection. Applying a calibration function produces corrected OD values ( $\text{Corr.OD}$ ) and a more accurate representative growth curve. **B**, A yeast population growth curve ( $\ln \text{Corr.OD}_t / \text{Corr.OD}_i$ ) depicting the three major derived growth traits ( $\lambda$ ,  $\mu$ , and  $\kappa$ ) and the dynamic standardizing measuring point, Phi ( $\phi$ ). **C**, Conceptual examples demonstrating the use of Area Under the Curve (AUC) as a measure of cumulative growth differences. Untreated yeast population growth (black) and two treatment growth scenarios (blue and red).  $\phi$  is allocated to the untreated growth curve. The red curve shows a slightly longer lag phase ( $\Delta\lambda$ ), reduced maximum rate of growth ( $\Delta\mu$ ; differences between yellow dotted tangent lines), and lower carrying capacity ( $\Delta\kappa$ ), captured as a substantially reduced AUC (shading) than that of the untreated black curve. The blue curve shows a longer lag phase, but growth rate and carrying capacity similar to untreated. No AUC is detected at  $\phi$ , but AUC can be detected by shifting to  $\phi_{+t}$  (note:  $\Delta\text{AUC}$  will be less (underestimated) when using  $\phi_{+t}$  as control population has ceased growing).

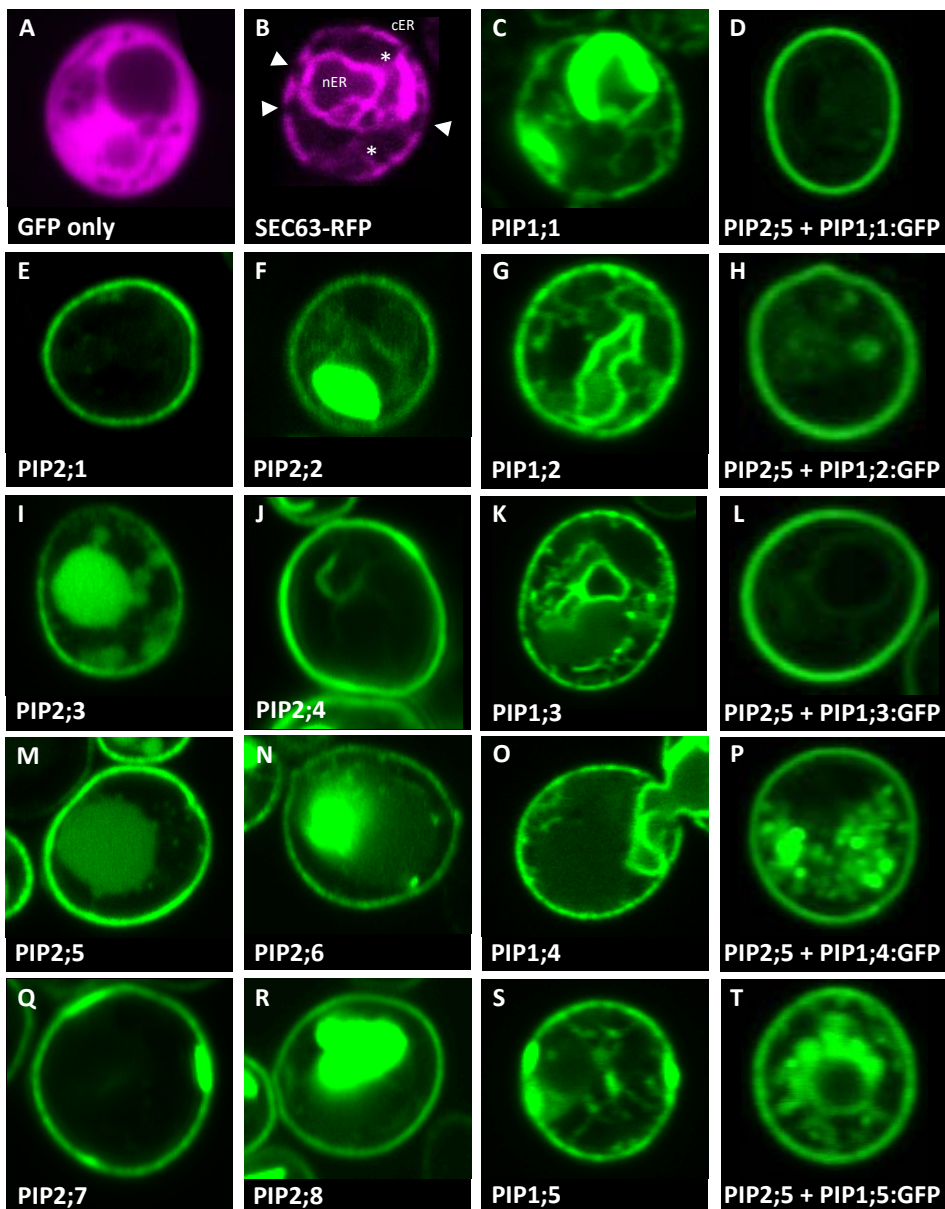

**Figure 2. Sub-cellular localisation of AtPIPs in yeast.** Confocal microscopy images of: **A**, an eGFP only control showing diffuse cytosolic localised signal. **B**, SEC63::RFP endoplasmic reticulum (ER) marker showing the prominent nuclear envelope ER domain (nER) and a peripheral or cortical ER domain (cER). The cER lies just beneath the plasma membrane but is not continuous around the perimeter with gaps distinguishing it from plasma membrane localisation (solid triangles). Cytoplasmic tubules link the two ER domains (\*). **E, F, I, J, M, N, Q and R**, AtPIP2-eGFP proteins expressed alone predominantly localise in a distinct continuous ring of signal around the cell perimeter coinciding with the plasma membrane. In several cases, eGFP signal can also be detected in internal storage vacuoles. **C, G, K, O and S**, AtPIP1-eGFP proteins expressed alone localise to the nER, ER tubules and a patchy cER signal overlaying PM localisation. **D, H, L, P and T**, AtPIP1-eGFP proteins co-expressed with AtPIP2;5 with the majority of the fluorescence signal localised to the PM, similar to AtPIP2 proteins. Fluorescence signal false colored red for marker lines in A and B, and green for AtPIP-GFP lines in C-T.

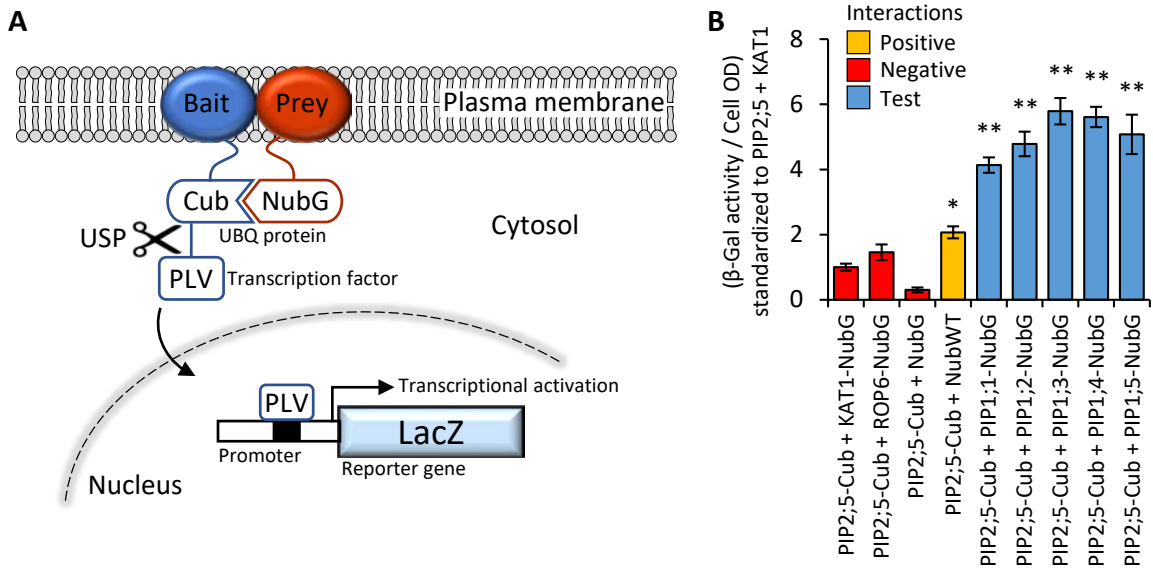

**Figure 3. A**, Illustration of mbSUS yeast two-hybrid system. The mutant N-terminal ubiquitin domain (NubG) and C-terminal ubiquitin domain (Cub) can reconstitute the full-length ubiquitin protein (UBQ) only when brought into close proximity via a membrane bound and interacting Bait and Prey protein combination. The reconstituted UBQ is recognised by Ubiquitin-Specific Proteases (USP), releasing the artificial transcription factor PLV (proteinA-LexA-VP16) that is translationally fused to the Cub domain. The freed PLV then enters the nucleus and activates the *LacZ* reporter gene that encodes for a  $\beta$ -galactosidase. **B**, AtPIP2;5 is capable of strong protein-protein interactions with each of the AtPIP1 isoforms. The intensity of the AtPIP2;5 (bait) and AtPIP1 (prey) interaction was assayed by measuring  $\beta$ -galactosidase activity via colorimetric monitoring of o-nitrophenyl- $\beta$ -D-galactoside (ONPG) conversion to the yellow o-nitrophenol. Control lines: NubG (pNX35-DEST), a mutant Nub variant with low affinity for Cub. When linked to plasma membrane localizing Arabidopsis ROP6 or KAT1 proteins, it acts as a prey control reporting incidental UBQ reconstitution through simple random close insertion of abundantly produced membrane bound proteins. NubG expressed alone should not interact with Cub and negligible reporter activity was observed. NubWT (pNubWTXgate) is a soluble cytoplasmic localized N-terminal ubiquitin domain with a high affinity for Cub and acts as a positive control able to interact with the Cub domain of AtPIP2;5-Cub independent of bait interaction. The detected activity (orange) demonstrates that the Cub domain fused to AtPIP2;5 was accessible to Nub and USPs. Each of the AtPIP2;5 + AtPIP1 interactions (blue) significantly exceeded spurious background levels (red). All error bars are SEM. ANOVA post-hoc Fisher's LSD versus ATPIP2;5 + KAT1, \*  $p < 0.05$ , \*\*  $p < 0.01$ . N = 4 biological reps over 2 experimental runs.



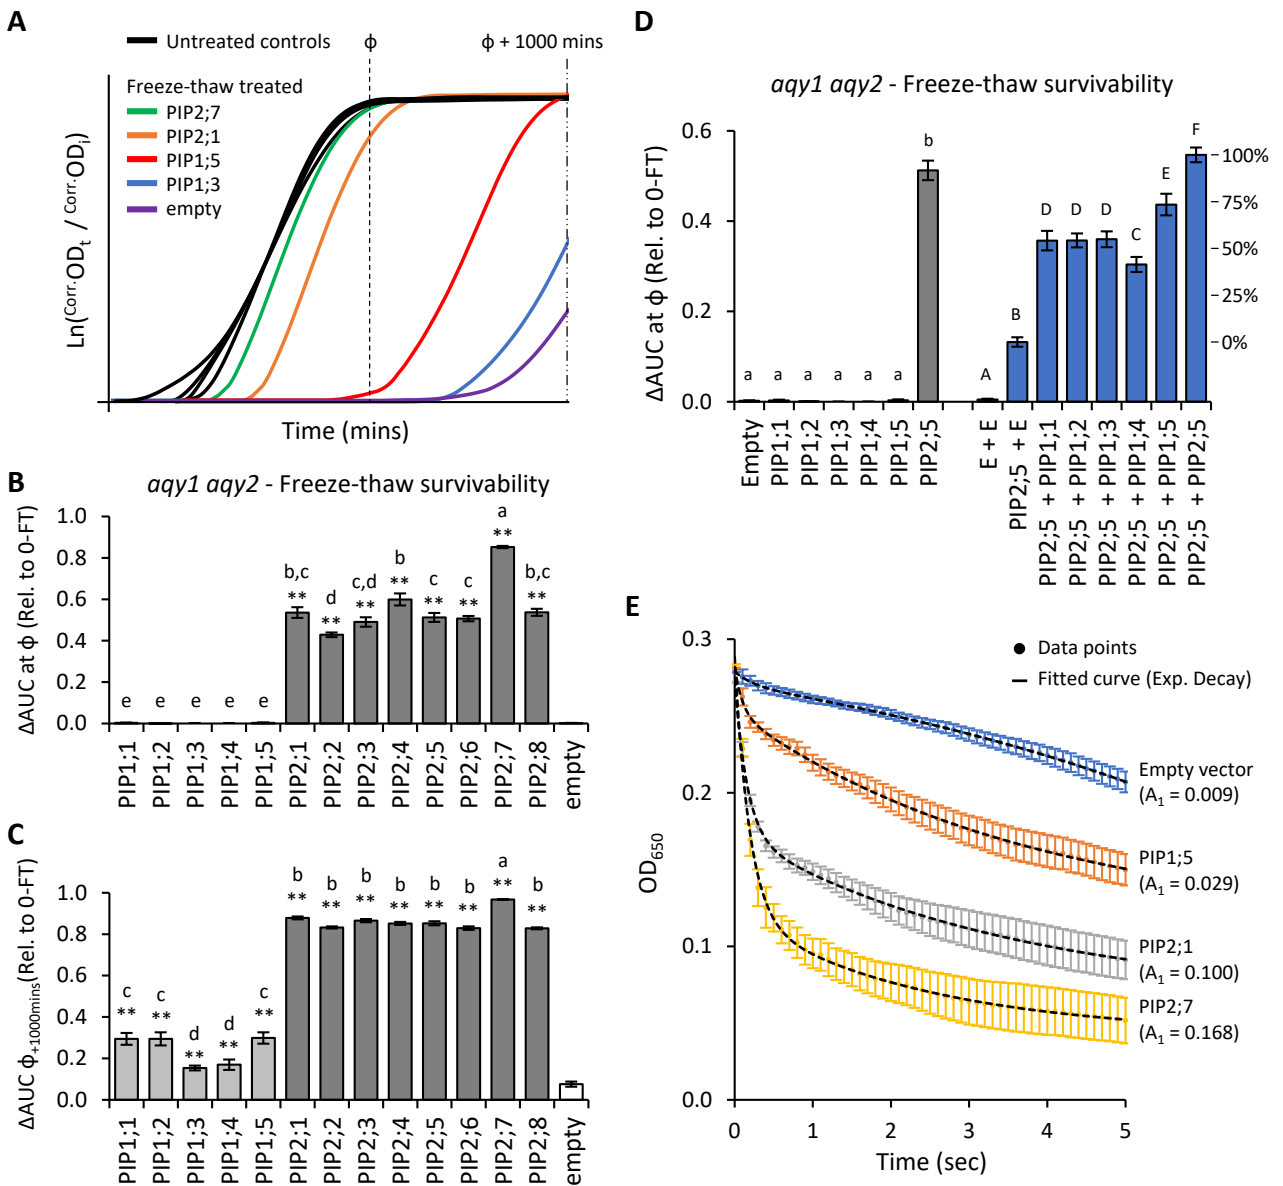

**Figure 4. Water permeability assays using two freeze-thaw cycles with yeast expressing different AQP genes.** **A**, Illustrative growth curves for untreated controls and following two freeze-thaw cycles. **B**, Relative AUC for the 13 AtPIP isoforms, calculated with  $\phi$ . **C**, Relative AUC after extended growth with AUC calculated at  $\phi+1000$ . **D**, Relative AUC for AtPIP1s expressed singly or co-expressed with AtPIP2;5. **E**, Change in OD of yeast spheroplast suspensions following osmotic shock. The contribution of the rapid initial phase (value in parentheses) reflects the permeability derived from fitted two-phase exponential curves; empty vector:  $y = [0.00881 \times e^{(-x/0.243)}] + [-0.05398 \times e^{(-x/-6.47128)}]$ ; AtPIP1;5:  $y = [0.02937 \times e^{(-x/0.09966)}] + [0.13874 \times e^{(-x/3.76055)}]$ ; AtPIP2;1:  $y = [0.10037 \times e^{(-x/0.15797)}] + [0.10763 \times e^{(-x/3.51469)}]$ ; AtPIP2;7:  $y = [0.16814 \times e^{(-x/0.18973)}] + [0.07791 \times e^{(-x/2.43538)}]$ . All error bars are SEM. For B-C, asterisks indicate statistical difference from empty vector control, ANOVA with Fishers LSD test (\*  $P < 0.05$ ; \*\*  $P < 0.01$ ); letters denote different statistical rankings, ANOVA with Tukey's test ( $P < 0.05$ ). For D, letters denote different statistical groupings, lowercase among single expressed and uppercase among co-expressed AtPIP yeast lines, ANOVA with Tukey's test ( $P < 0.05$ ). N = 12 (AtPIP1s) and 8 (AtPIP2s) across 4 experimental runs for B and C. N = 6 across 3 experimental runs for D. N = 6 across 2 experimental runs for E.

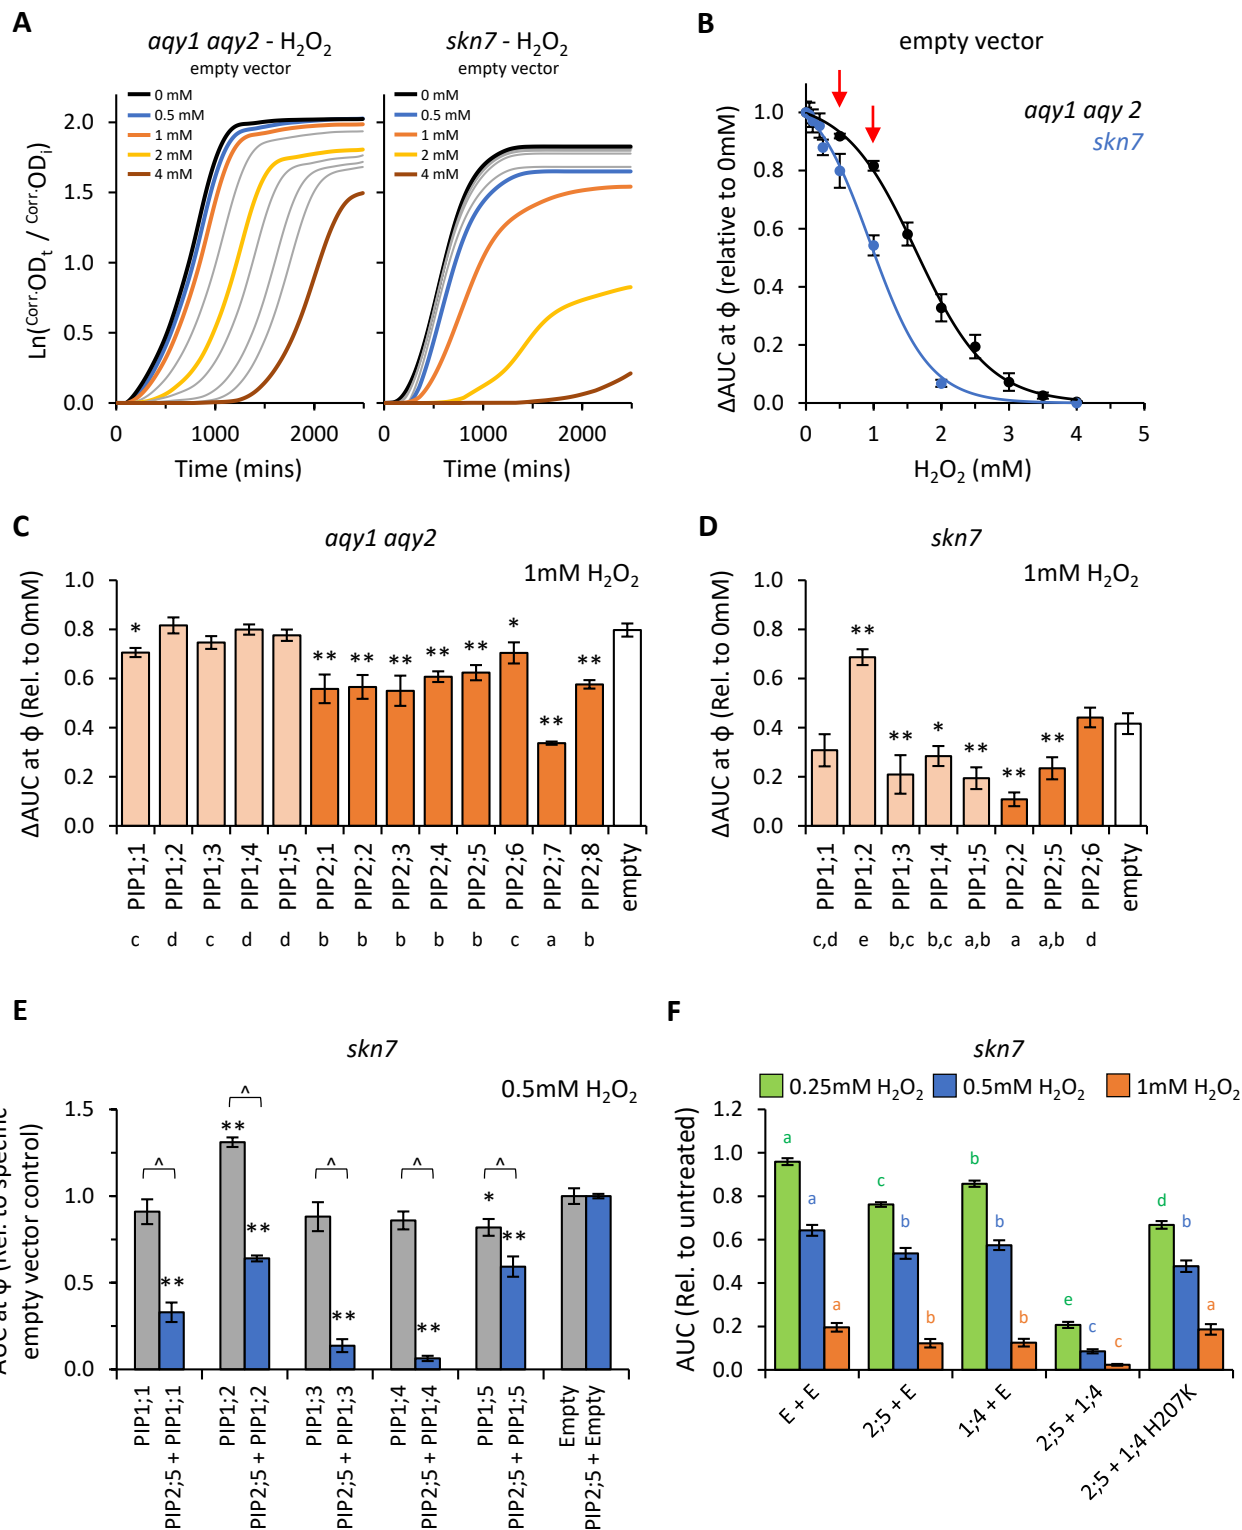

**Figure 5. H<sub>2</sub>O<sub>2</sub> permeability assays.** **A**, Comparison of growth curves of two yeast strains, *aqy1 aqy2* or *skn7*, exposed to increasing H<sub>2</sub>O<sub>2</sub> concentrations. **B**, Dose response curves showing relative AUC as a function of H<sub>2</sub>O<sub>2</sub> concentration for each strain. *skn7* yeast are more sensitive to H<sub>2</sub>O<sub>2</sub> treatment than *aqy1 aqy2* yeast. Red arrows indicate H<sub>2</sub>O<sub>2</sub> concentrations chosen for testing yeast expressing *AtPIP*. **C**, Relative AUC for *aqy1 aqy2* yeast expressing each *AtPIP* gene exposed to 1mM H<sub>2</sub>O<sub>2</sub>. **D**, Relative AUC for *skn7* yeast expressing *AtPIP* genes exposed to 1mM H<sub>2</sub>O<sub>2</sub>. **E**, Relative AUC for *skn7* yeast exposed to 0.5mM H<sub>2</sub>O<sub>2</sub> expressing *AtPIP1* singly (grey) or together with *AtPIP2;5* (blue). Each set is standardized to their respective empty vector control. **F**, Relative AUC for *skn7* yeast expressing various combinations of *AtPIP* genes at 0.25, 0.5 and 1mM H<sub>2</sub>O<sub>2</sub>. All error bars are SEM. For C and D, asterisks indicate statistical difference from empty vector control, ANOVA with Fishers LSD test (\* *P* < 0.05; \*\* *P* < 0.01); letters denote different statistical rankings across both 0.5 and 1mM H<sub>2</sub>O<sub>2</sub>, ANOVA with Tukey's test (*P* < 0.05). For E, asterisks indicate statistical difference from empty vector control, ANOVA with Fishers LSD test (\* *P* < 0.05; \*\* *P* < 0.01); chevrons (^) indicate statistical difference between single vs. co-expression (Student's *t* test *P* < 0.01). For F, color coded letters denote different statistical groupings within [H<sub>2</sub>O<sub>2</sub>] treatments, ANOVA with Fishers LSD test. N = 4 bio reps for B. N = 6 (2 biological reps x 3 experimental runs) for C. N = 8 across 4 experimental runs for D. For E, N = 12 across 6 experimental runs for single expressed *AtPIPs* and N = 6 across 3 experimental runs for co-expressed lines. N = 16 across 4 experimental runs for F.

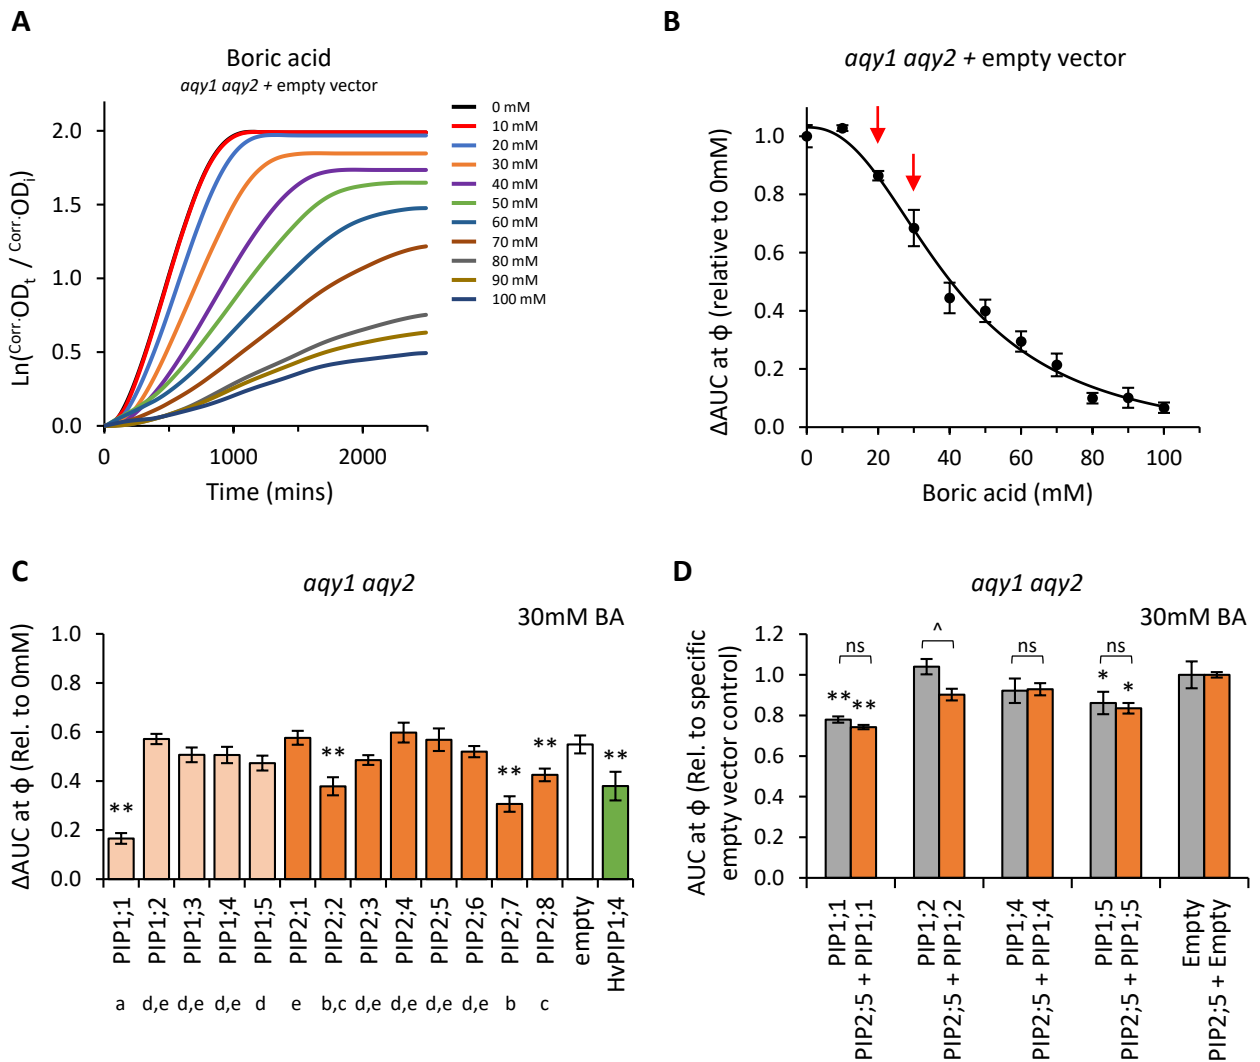

**Figure 6. Boric acid permeability assays.** **A**, Growth curves for *aqy1 aqy2* yeast exposed to increasing concentrations of boric acid (BA). **B**, Dose response curve of relative AUC as a function of boric acid concentration. Red arrows denote BA concentrations chosen for testing yeast expressing *AtPIP*. **C**, Relative AUC for *aqy1 aqy2* yeast expressing each *AtPIP* gene exposed to 30mM boric acid, with *HvPIP1;4* as a boric acid permeable control. **D**, Relative AUC for *aqy1 aqy2* yeast expressing *AtPIP1* singly (grey) or together with *AtPIP2;5* (orange) at 30mM boric acid. Each set is standardized to their respective empty vector control. All error bars are SEM. For C, asterisks indicate statistical difference from empty vector control, ANOVA with Fishers LSD test (\*  $P < 0.05$ ; \*\*  $P < 0.01$ ); letters denote different statistical rankings across both 20 and 30mM boric acid, ANOVA with Tukey's test ( $P < 0.05$ ). For D, asterisks indicate statistical difference from respective empty vector control, ANOVA with Fishers LSD test (\*  $P < 0.05$ ; \*\*  $P < 0.01$ ); chevrons (^) indicate statistical difference between single vs. co-expression (Student's  $t$  test  $P < 0.01$ ). For C and D,  $N = 6$  across 3 experimental runs.

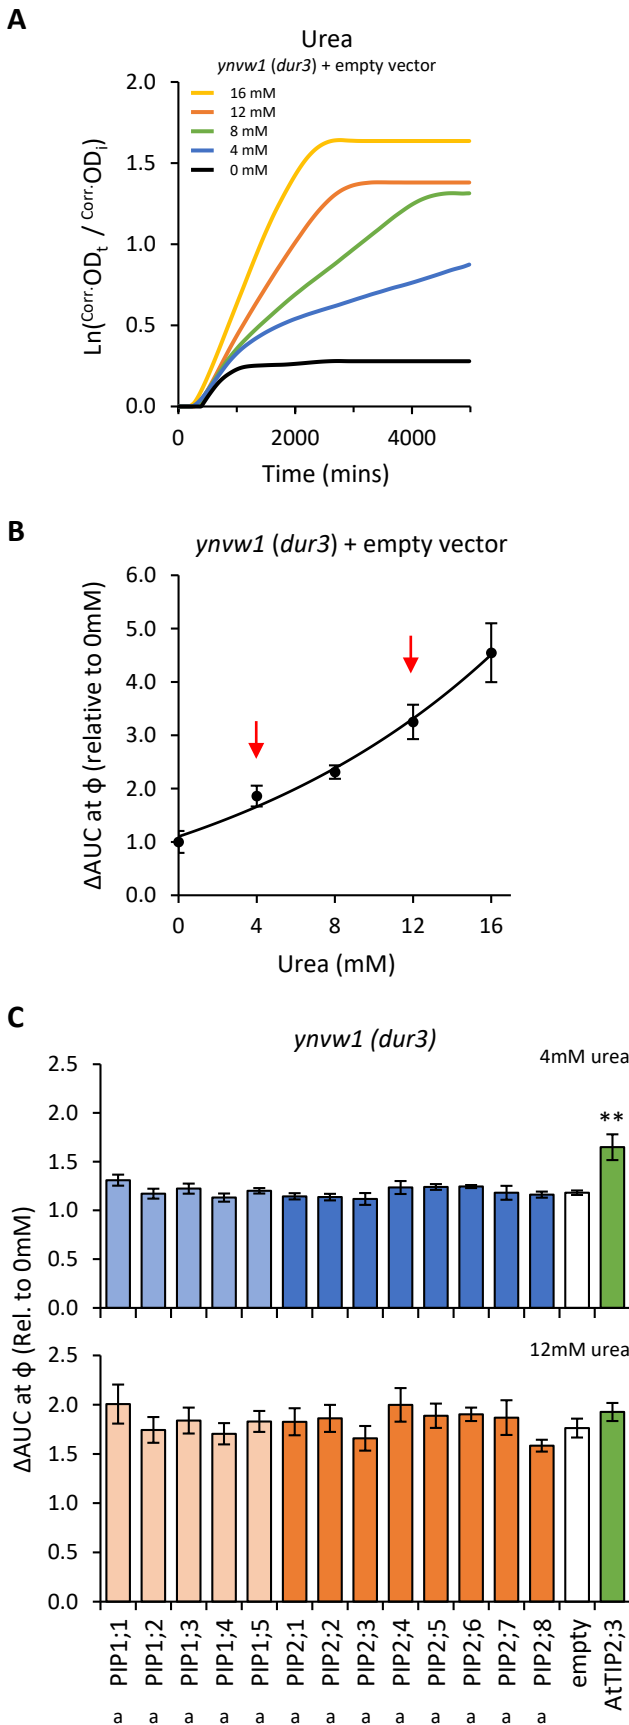

**Figure 7. Urea permeability assays.** **A**, Growth curves of *ynvw1 (dur3)* yeast supplied with increasing concentrations of urea. **B**, Relative AUC as a function of urea concentration. Red arrows denote urea concentrations chosen for testing yeast expressing *AtPIP*. **C**, Relative AUC for yeast expressing each *AtPIP* grown with 4 or 12mM urea, with *AtTIP2;3* as a urea permeable control. All error bars are SEM. For C, asterisks indicate statistical difference from empty vector control, ANOVA with Fishers LSD test (\*  $P < 0.05$ ; \*\*  $P < 0.01$ ); letters denote statistical rankings across both 4 and 12mM urea, ANOVA with Tukey's test ( $P < 0.05$ ). For C,  $N = 6$  across 3 experimental runs.

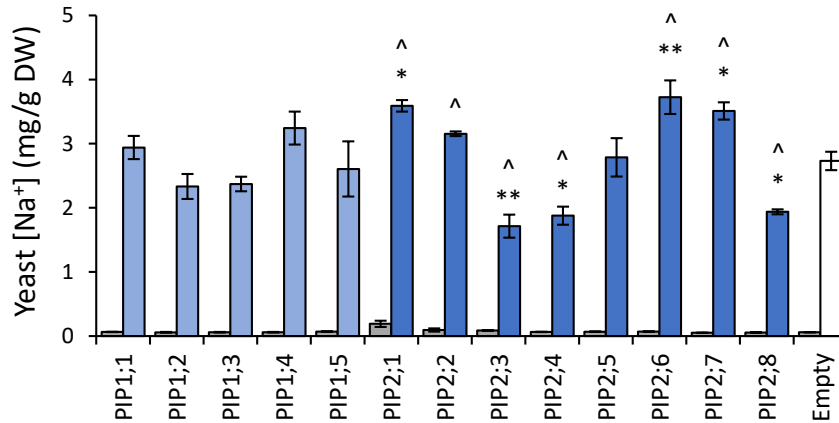

**Figure 8. Na<sup>+</sup> permeability assay.** Yeast cellular sodium content before (grey) and after (blue) exposure to 70mM NaCl for 40 mins. Error bars are SEM. Asterisks indicate statistical difference from empty vector control, ANOVA with Fishers LSD test (\*  $P < 0.05$ ; \*\*  $P < 0.01$ ). Chevrons (^) indicate statistical difference from empty vector control, Student's  $t$  test  $P < 0.05$ . N = 3 for AtPIPs and N = 2 for empty vector.



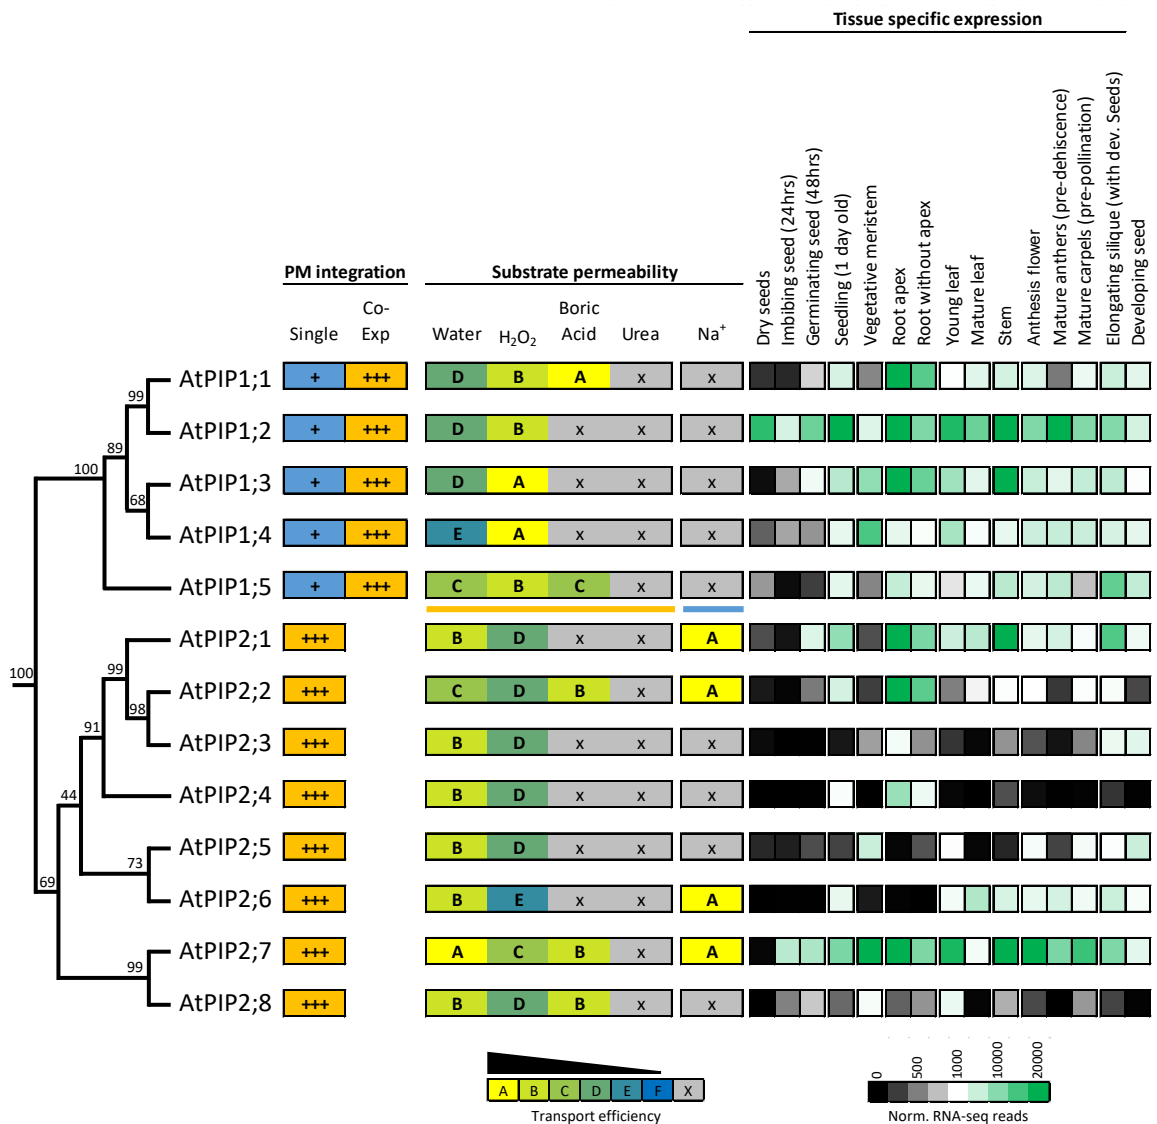

**Figure 9. Summary of permeability and expression data for the AtPIP isoforms.** The phylogenetic relationship is shown on the left, followed by strength of integration into the plasma membrane (PM) when expressed singly or co-expressed with a PIP2 (PIP1s only). Substrate permeabilities are shown in the center, and relative gene expression across different tissues during development, are shown on the right. The phylogeny is full protein sequence, using neighbor-joining method from MUSCLE alignments of protein sequences, with confidence levels (%) of branch points generated through bootstrapping analysis (n = 1000). Permeability and transport efficiencies for AtPIP1 are based on co-expression with AtPIP2;5 for water, H<sub>2</sub>O<sub>2</sub>, boric acid and urea (orange underline below AtPIP1;5) and singly expressed AtPIP1s for Na<sup>+</sup> permeability (blue line under AtPIP1;5).
